# Supplementary material for: Metal–organic fireworks: MOFs as integrated structural scaffolds for pyrotechnic materials
Source: Royal Society of Chemistry journal article supplement (doi:10.1039/c5cc04174k), 2015-01-01
Supplement: c5cc04174k1.pdf [file c5cc04174k1.pdf]

# Metal-Organic Fireworks! Coordination polymers as integrated structural scaffolds for pyrotechnic materials

*Lisa H. Blair, Simon J. Coles\*, Ayhan Colakel, Ian Sinclair, Ranko Vrcelj*

## Supporting Information

### 1. General Methods

The oxidisers (calcium nitrate, strontium nitrate, barium nitrate, rubidium nitrate, and cesium nitrate) were obtained from Wallop Defence Systems Limited. Sodium nitrate and potassium nitrate were purchased from Sigma-Aldrich. Terephthalic acid (BDC) was purchased from Alfa Aesar and tetrafluoroterephthalic acid (fBDC) was purchased from Fluorochem. The other reagents used in the following experiments were of analytical grade or better unless otherwise stated. These materials were used without purification. The structural characterisation was carried out using single crystal and powder x-ray diffraction. The thermal analysis of each MOF described below was carried out using a Mettler-Toledo differential scanning calorimeter instrument, model DSC821e, equipped with a liquid nitrogen low temperature attachment and a TSO801RO Universal sample robot (heating rate: 10°Cmin<sup>-1</sup>; the flow rate of nitrogen gas: 40ml/min; the sample size: 4 – 10mg in 40µl aluminium dishes).

### 2. Synthetic Procedures

The initial synthetic procedure was adapted from a MOF5 synthesis <sup>[1]</sup>. 4mmol metal nitrate and 2mmol 1,2-BDC/1,3-BDC/1,4-BDC/1,2-fBDC/1,3-fBDC/1,4-fBDC was added to 40 ml DMF and stirred at room temperature. (Sr(NO<sub>3</sub>)<sub>2</sub> and Ba(NO<sub>3</sub>)<sub>2</sub> were stirred overnight before the addition of the diacid). Once a colourless solution was observed 2.2ml TEA(deprotonating agent) was added dropwise. After stirring for 30-45 minutes a white precipitate was collected using a sinter funnel. The product was immersed in chloroform for 24 hours to exchange DMF solution.

The second synthetic procedure used in this work was adapted from another synthesis used by W. Clegg and L. Russo to investigate alkali metal complexes of isophthalic acid. <sup>[2]</sup> 0.5mmol metal nitrate was added to a conical flask containing methanol (Na, Ca nitrates = 10ml; K, Ru, Sr nitrates = 20ml; Cs, Ba nitrates = 30ml). The solutions were allowed to stir for 2 hours before the addition of 0.5mmol diacid. After stirring for an additional 1 hour, 1ml of pyridine (deprotonating agent) was added dropwise and allowed to stir for 3 hours before being distributed into both glass vials and petri dishes.

(**1** = 1,4BDC; **2** = 1,3-BDC; **3** = 1,2-BDC; **4** = 1,4-fBDC; **5** = 1,3-fBDC; **6** = 1,2-fBDC)

• crystal structure obtained

**K1\_1** - This complex was obtained following method 1 using KNO<sub>3</sub> (4 mmol, 0.404 g) and 1,4-BDC (2 mmol, 0.332g).

**K1\_2** - This complex was obtained following method 2 using KNO<sub>3</sub> (0.5 mmol, 0.051g) and 1,4-BDC (0.5 mmol, 0.083g).

**K2\_1** - This complex was obtained following method 1 using KNO<sub>3</sub> (4 mmol, 0.404 g) and 1,3-BDC (2 mmol, 0.332g).

**K2\_2** - This complex was obtained following method 2 using KNO<sub>3</sub> (0.5 mmol, 0.051g) and 1,3-BDC (0.5 mmol, 0.083g).

**K3\_1** - This complex was obtained following method 1 using KNO<sub>3</sub> (4 mmol, 0.404 g) and 1,2-BDC (2 mmol, 0.332g).

**K3\_2** - This complex was obtained following method 2 using KNO<sub>3</sub> (0.5 mmol, 0.051g) and 1,2-BDC (0.5 mmol, 0.083g).

**\*K4\_2** - This complex was obtained following method 2 using KNO<sub>3</sub> (0.5 mmol, 0.051g) and 1,4-fBDC (0.5 mmol, 0.119g).

**K6\_1** - This complex was obtained following method 1 using KNO<sub>3</sub> (4 mmol, 0.404 g) and 1,2-fBDC (2 mmol, 0.476g).

**Rb1\_1** - This complex was obtained following method 1 using RbNO<sub>3</sub> (4 mmol, 0.590g) and 1,4-BDC (2 mmol, 0.332g).

**Rb1\_2** - This complex was obtained following method 2 using  $\text{RbNO}_3$  (0.5 mmol, 0.074g) and 1,4-BDC (0.5 mmol, 0.083g).

**\*Rb4\_2** - This complex was obtained following method 2 using  $\text{RbNO}_3$  (0.5mmol, 0.074g) and 1,4-fBDC (0.5mmol, 0.119g).

**Cs1\_1** - This complex was obtained following method 1 using  $\text{CsNO}_3$  (4 mmol, 0.780g) and 1,4-BDC (2 mmol, 0.332g).

**Cs1\_2** - This complex was obtained following method 2 using  $\text{CsNO}_3$  (0.5 mmol, 0.097g) and 1,4-BDC (0.5 mmol, 0.083g).

**\*Cs4\_2** - This complex was obtained following method 2 using  $\text{CsNO}_3$  (0.5 mmol, 0.097g) and 1,4-fBDC (0.5 mmol, 0.119g).

**Ca1\_1** - This complex was obtained following method 1 using  $\text{Ca}(\text{NO}_3)_2 \cdot 4\text{H}_2\text{O}$  (4 mmol, 0.945 g) and 1,4-BDC (2 mmol, 0.332 g).

**\*Ca1\_2** - This complex was obtained following method 2 using  $\text{Ca}(\text{NO}_3)_2 \cdot 4\text{H}_2\text{O}$  (0.5mmol, 0.118 g) and 1,4-BDC (0.5 mmol, 0.083g).

**Ca2\_1** - This complex was obtained following method 1 using  $\text{Ca}(\text{NO}_3)_2 \cdot 4\text{H}_2\text{O}$  (4 mmol, 0.945 g) and 1,3-BDC (2 mmol, 0.332 g).

**Ca2\_2** - This complex was obtained following method 2 using  $\text{Ca}(\text{NO}_3)_2 \cdot 4\text{H}_2\text{O}$  (0.5mmol, 0.118 g) and 1,3-BDC (0.5 mmol, 0.083g).

**Ca3\_2** - This complex was obtained following method 2 using  $\text{Ca}(\text{NO}_3)_2 \cdot 4\text{H}_2\text{O}$  (0.5mmol, 0.118 g) and 1,2-BDC (0.5 mmol, 0.083g).

**Ca4\_1** - This complex was obtained following method 1 using  $\text{Ca}(\text{NO}_3)_2 \cdot 4\text{H}_2\text{O}$  (4 mmol, 0.945 g) and 1,4-fBDC (2 mmol, 0.476g).

**\*Ca4\_2** - This complex was obtained following method 2 using  $\text{Ca}(\text{NO}_3)_2 \cdot 4\text{H}_2\text{O}$  (0.5mmol, 0.118 g) and 1,4-fBDC (0.5 mmol, 0.119g).

**Ca5\_1** - This complex was obtained following method 1 using  $\text{Ca}(\text{NO}_3)_2 \cdot 4\text{H}_2\text{O}$  (4 mmol, 0.945 g) and 1,3-fBDC (2 mmol, 0.476g).

**Ca5\_2** - This complex was obtained following method 2 using  $\text{Ca}(\text{NO}_3)_2 \cdot 4\text{H}_2\text{O}$  (0.5mmol, 0.118 g) and 1,3-fBDC (0.5 mmol, 0.119g).

**Ca6\_1** - This complex was obtained following method 1 using  $\text{Ca}(\text{NO}_3)_2 \cdot 4\text{H}_2\text{O}$  (4 mmol, 0.945 g) and 1,2-fBDC (2 mmol, 0.476g).

**\*Ca6\_2** - This complex was obtained following method 2 using  $\text{Ca}(\text{NO}_3)_2 \cdot 4\text{H}_2\text{O}$  (0.5mmol, 0.118 g) and 1,2-fBDC (0.5 mmol, 0.119g).

**\*Sr1\_1** - This complex was obtained following method 1 using  $\text{Sr}(\text{NO}_3)_2$  (4 mmol, 0.847g) and 1,4-BDC (2 mmol, 0.332g).

**\*Sr1\_2** - This complex was obtained following method 2 using  $\text{Sr}(\text{NO}_3)_2$  (0.5 mmol, 0.106g) and 1,4-BDC (0.5 mmol, 0.083g).

**Sr2\_1** - This complex was obtained following method 1 using  $\text{Sr}(\text{NO}_3)_2$  (4 mmol, 0.847g) and 1,3-BDC (2 mmol, 0.332g).

**Sr2\_2** - This complex was obtained following method 2 using  $\text{Sr}(\text{NO}_3)_2$  (0.5 mmol, 0.106g) and 1,3-BDC (0.5 mmol, 0.083g).

**Sr3\_2** - This complex was obtained following method 2 using  $\text{Sr}(\text{NO}_3)_2$  (0.5 mmol, 0.106g) and 1,2-BDC (0.5 mmol, 0.083g).

**Sr4\_1** - This complex was obtained following method 1 using  $\text{Sr}(\text{NO}_3)_2$  (4 mmol, 0.847g) and 1,4-fBDC (2 mmol, 0.476g).

**\*Sr4\_2** - This complex was obtained following method 2 using  $\text{Sr}(\text{NO}_3)_2$  (0.5 mmol, 0.106g) and 1,4-BDC (0.5 mmol, 0.119g).

**\*Sr5\_1** - This complex was obtained following method 1 using Sr(NO<sub>3</sub>)<sub>2</sub>. (4 mmol, 0.847 g) and 1,3-fBDC (2 mmol, 0.476g).

**\*Sr5\_2** - This complex was obtained following method 2 using Sr(NO<sub>3</sub>)<sub>2</sub>. (0.5 mmol, 0.106g) and 1,3-fBDC (0.5 mmol, 0.119g).

**\*Sr6\_1** - This complex was obtained following method 1 using Sr(NO<sub>3</sub>)<sub>2</sub>. (4 mmol, 0.847 g) and 1,2-fBDC (2 mmol, 0.476g).

**\*Sr6\_2** - This complex was obtained following method 2 using Sr(NO<sub>3</sub>)<sub>2</sub>. (0.5 mmol, 0.106g) and 1,2-fBDC (0.5 mmol, 0.119g).

**Ba1\_1** - This complex was obtained following method 1 using Ba(NO<sub>3</sub>)<sub>2</sub>. (4 mmol, 1.045g) and 1,4-BDC (2 mmol, 0.332g).

**\*Ba1\_2** - This complex was obtained following method 2 using Ba(NO<sub>3</sub>)<sub>2</sub>. (0.5 mmol, 0.131 g) and 1,4-BDC (0.5 mmol, 0.083g).

**Ba2\_1** - This complex was obtained following method 1 using Ba(NO<sub>3</sub>)<sub>2</sub>. (4 mmol, 1.045g) and 1,3-BDC (2 mmol, 0.332g).

**Ba2\_2** - This complex was obtained following method 2 using Ba(NO<sub>3</sub>)<sub>2</sub>. (0.5 mmol, 0.131 g) and 1,3-BDC (0.5 mmol, 0.083g).

**Ba3\_2** - This complex was obtained following method 2 using Ba(NO<sub>3</sub>)<sub>2</sub>. (0.5 mmol, 0.131 g) and 1,2-BDC (0.5 mmol, 0.083g).

**Ba4\_1** - This complex was obtained following method 1 using Ba(NO<sub>3</sub>)<sub>2</sub>. (4 mmol, 1.045g) and 1,4-fBDC (2 mmol, 0.476g).

**\*Ba4\_2** - This complex was obtained following method 2 using Ba(NO<sub>3</sub>)<sub>2</sub>. (0.5 mmol, 0.131 g) and 1,4-fBDC (0.5 mmol, 0.119g).

**Ba5\_1** - This complex was obtained following method 1 using Ba(NO<sub>3</sub>)<sub>2</sub>. (4 mmol, 1.045g) and 1,3-fBDC (2 mmol, 0.476g).

**Ba5\_2** - This complex was obtained following method 2 using Ba(NO<sub>3</sub>)<sub>2</sub>. (0.5 mmol, 0.131 g) and 1,3-fBDC (0.5 mmol, 0.119g).

**Ba6\_1** - This complex was obtained following method 1 using Ba(NO<sub>3</sub>)<sub>2</sub>. (4 mmol, 1.045g) and 1,2-fBDC (2 mmol, 0.476g).

**\*Ba6\_2** - This complex was obtained following method 2 using Ba(NO<sub>3</sub>)<sub>2</sub>. (0.5 mmol, 0.131 g) and 1,2-fBDC (0.5 mmol, 0.119g).

The successful syntheses and crystal structure determinations can be summarised in the following table:

|    | 1                   | 2                 | 3                 | 4                 | 5                  | 6                  |
|----|---------------------|-------------------|-------------------|-------------------|--------------------|--------------------|
| K  | MeOH/<br>DMF<br>x   | MeOH/<br>DMF<br>x | MeOH/<br>DMF<br>x | MeOH<br>✓         | No<br>product      | DMF<br>x           |
| Rb | MeOH/<br>DMF<br>x   | No<br>product     | No<br>product     | MeOH<br>✓         | No<br>product      | No<br>product      |
| Cs | MeOH/<br>DMF<br>x   | No<br>product     | No<br>product     | MeOH<br>✓         | No<br>product      | No<br>product      |
| Ca | MeOH/<br>DMF<br>✓   | MeOH/<br>DMF<br>x | MeOH<br>x         | MeOH/<br>DMF<br>✓ | MeOH/<br>DMF<br>x  | MeOH/<br>DMF<br>✓  |
| Sr | MeOH/<br>DMF<br>✓✓✓ | MeOH/<br>DMF<br>x | MeOH<br>x         | MeOH/<br>DMF<br>✓ | MeOH/<br>DMF<br>✓✓ | MeOH/<br>DMF<br>✓✓ |

|    |       |       |      |       |       |       |
|----|-------|-------|------|-------|-------|-------|
|    | MeOH/ | MeOH/ | MeOH | MeOH/ | MeOH/ | MeOH/ |
| Ba | DMF   | DMF   |      | DMF   | DMF   | DMF   |
|    | ✖     | ✖     | ✖    | ✓     | ✖     | ✓     |

MeOH/DMF = successful synthesis route; ✓, ✓✓, ✓✓✓ = outcome of crystal structure determination indicating the number of structures obtained; ✖ = product created, but not isolated or single crystal structure obtained.



### 3. Group 1 MOF Results

#### 3.1 Single-crystal X-ray diffraction analyses

Single-crystal X-ray diffraction data for **K4\_2**, **Rb4\_2**, and **Cs4\_2** were collected at 293K on a Rigaku AFC12 goniometer equipped with an enhanced sensitivity (HG) Saturn 724+ detector mounted at the window of an FR-E+ Superbright Mo K $\alpha$  rotating anode generator with optics VHF Varimax 70 $\mu$ m focus and equipped with an Oxford CryosystemsCobra<sup>19</sup> cooling device. Cell determination, data collection, data reduction, cell refinement and absorption corrections were carried out using CrystalClear-SM Expert 3.1 b27 software<sup>20</sup>. All structures were solved using Superflip<sup>21</sup>. All structures were refined using full-matrix least-squares refinements in the SHELX2013 software<sup>22</sup>. All non-hydrogen atoms were refined with anisotropic displacement parameters. All hydrogen atoms were added at calculated positions and refined using a riding model with isotropic displacement parameters based on the equivalent isotropic displacement parameter (Ueq) of the parent atom.

| Identification code                                      | <b>K4_2</b>                                                 | <b>Rb4_2</b>                                    | <b>Cs4_2</b>                                   |
|----------------------------------------------------------|-------------------------------------------------------------|-------------------------------------------------|------------------------------------------------|
| <b>Empirical formula</b>                                 | C <sub>8</sub> F <sub>4</sub> K <sub>2</sub> O <sub>4</sub> | C <sub>8</sub> F <sub>4</sub> O <sub>4</sub> Rb | C <sub>8</sub> CsF <sub>4</sub> O <sub>4</sub> |
| <b>Formula weight</b>                                    | 314.28                                                      | 321.55                                          | 368.99                                         |
| <b>Temperature (K)</b>                                   | 293(2)                                                      | 293(2)                                          | 293(2)                                         |
| <b>Wavelength (Å)</b>                                    | 0.71075                                                     | 0.71075                                         | 0.71075                                        |
| <b>Crystal system</b>                                    | Monoclinic                                                  | Monoclinic                                      | Monoclinic                                     |
| <b>Space group</b>                                       | <i>I</i> 2/m                                                | <i>I</i> 2/a                                    | <i>I</i> 2/a                                   |
| <i>Unit cell dimensions</i>                              |                                                             |                                                 |                                                |
| <b>a (Å)</b>                                             | 4.03902(2)                                                  | 9.2821(7)                                       | 9.3605(7)                                      |
| <b>b (Å)</b>                                             | 19.9427(18)                                                 | 9.7189(7)                                       | 9.6918(7)                                      |
| <b>c (Å)</b>                                             | 6.0405(4)                                                   | 10.9837(8)                                      | 11.0752(7)                                     |
| <b><math>\alpha</math> (°)</b>                           | 90                                                          | 90                                              | 90                                             |
| <b><math>\beta</math> (°)</b>                            | 91.319(8)                                                   | 110.340(5)                                      | 108.566(5)                                     |
| <b><math>\gamma</math> (°)</b>                           | 90                                                          | 90                                              | 90                                             |
| <b>Volume/Å<sup>3</sup></b>                              | 485.45(6)                                                   | 929.08(12)                                      | 952.45(12)                                     |
| <b>Z</b>                                                 | 2                                                           | 4                                               | 4                                              |
| <b><math>\rho</math>calc (mg/mm<sup>3</sup>)</b>         | 2.150                                                       | 2.299                                           | 2.573                                          |
| <b>Absorption coefficient (mm<sup>-1</sup>)</b>          | 1.042                                                       | 5.394                                           | 3.951                                          |
| <b>F(000)</b>                                            | 308                                                         | 612                                             | 684                                            |
| <b>Crystal</b>                                           | Needle; Colourless                                          | Block; Colourless                               | Block; Colourless                              |
| <b>Crystal size (mm<sup>3</sup>)</b>                     | 0.120 x 0.010 x 0.010                                       | 0.100 x 0.050 x 0.040                           | 0.150 x 0.100 x 0.050                          |
| <b><math>\theta</math> range for data collection (°)</b> | 3.525 – 27.486                                              | 3.142 - 27.313                                  | 2.860 - 27.540                                 |
| <b>Reflections collected</b>                             | 3275                                                        | 5406                                            | 5821                                           |
| <b>Independent reflections</b>                           | 578 [0.0373]                                                | 1045 [0.0665]                                   | 1103 [0.0310]                                  |
| <b>Completeness to <math>\theta</math> max</b>           | 99.6 %                                                      | 99.8 %                                          | 99.9 %                                         |
| <b>Max and min transmission</b>                          | 1.000 and 0.657                                             | 1.000 and 0.661                                 | 1.000 and 0.819                                |
| <b>Data/restraints/parameters</b>                        | 578 / 0 / 43                                                | 1045 / 0 / 78                                   | 1103 / 0 / 78                                  |
| <b>Goodness-of-fit on F2</b>                             | 1.083                                                       | 1.098                                           | 1.097                                          |
| <b>Final R indexes [<math>I \geq 2\sigma(I)</math>]</b>  | R1 = 0.0257,<br>wR2 = 0.0724                                | R1 = 0.0802,<br>wR2 = 0.1850                    | R1 = 0.0214,<br>wR2 = 0.0559                   |
| <b>Final R indexes [all data]</b>                        | R1 = 0.0298,<br>wR2 = 0.0744                                | R1 = 0.0837,<br>wR2 = 0.1900                    | R1 = 0.0214,<br>wR2 = 0.0559                   |
| <b>Largest diff. peak/hole (e Å<sup>-3</sup>)</b>        | 0.267/-0.243                                                | 3.634/-0.627                                    | 0.687/-0.762                                   |
| <b>CCDC deposition number/reference code</b>             | CCDC-959837/PIPDOJ                                          | 1046530                                         | 1046529                                        |

**Table S1 - Group 1 (1,4-fBDC) Products SXRD Data**

### 3.2 Structure Discussion

#### K4\_2

Complex **K4\_2**, previously reported by Werker et al., crystallises in the monoclinic  $I2/m$  space group as a 3D non-porous metal-organic framework.<sup>[3]</sup> The asymmetric unit is made up of one K(I) ion and roughly one quarter fBDC ligand. The K(I) ion is coordinated to six O atoms from five different carboxylate groups (one bidentate ( $K1-O1 = 2.862(2)\text{\AA}$ ) and four monodentate ( $K1-O1 = 2.716(2)\text{\AA}$  x2, and  $K1-O1 = 2.856(2)\text{\AA}$  x2) associated with the fBDC ligands to form a distorted trigonal prism which is completed by two  $K\cdots F$  contacts [ $2.840(2)\text{\AA}$ ] to two of the five coordinating ligands. These distances are in reasonable agreement with the K–O distances found in ionic K<sub>2</sub>O ( $K-O = 2.787\text{\AA}$ ) and somewhat longer than the K–F distances found in ionic KF ( $K-F = 2.672\text{\AA}$ ).  $K(\text{COO})_5$  link together to create 2D sheets which are cross-linked through the fBDC linkers along the crystallographic b axis creating a 3D structure. This 3D MOF has been determined by PLATON to have no solvent accessible voids.<sup>[4]</sup>

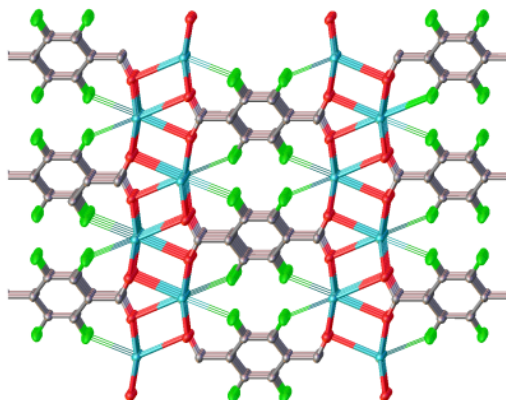

Figure S1 - K4\_2 SXRD

#### Rb4\_2/Cs4\_2

Both complexes, Rb4\_2 and Cs4\_2, crystallise in the monoclinic  $I2/a$  space group as a 3D non-porous MOF. The asymmetric unit is made up of one Rb/Cs ion, and one quarter fBDC ligand. The Rb(I) ion is coordinated to six O atoms associated with six different carboxylates (all bound in a monodentate fashion ( $Rb1-O1 = 3.049(3)\text{\AA}$ , x2,  $Rb1-O2 = 3.061(5)\text{\AA}$ , x2,  $Rb1-O2 = 3.070(4)\text{\AA}$ , x2) associated with six fBDC ligands forming a distorted trigonal prism which is completed by two  $Rb\cdots F$  contacts [ $3.179(3)\text{\AA}$ ] to two of the six coordinating ligands.  $Rb(\text{COO})_6$  link together to create 2D sheets which are cross-linked by the fBDC linkers along the crystallographic c axis creating a 3D structure.

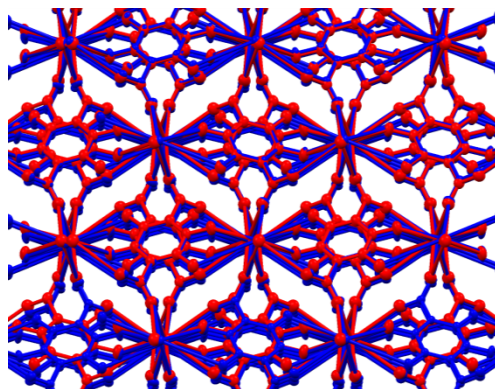

Figure S2 - Rb4\_2/Cs4\_2 SXRD

### 3.3 Powder X-ray diffraction analyses

The Bruker D2 Phaser benchtop powder XRD system (which uses a (30kv, 10mA) Cu ( $K\alpha_1/K\alpha_2$ ) radiation source and a Ni  $K\beta$  filter (detector side), additional beam optics and settings: primary and secondary axial Soller slits ( $2.5^\circ$ ), fixed 0.6mm divergence slit, 1mm anti-scatter-screen, detector: 1D LYNXEYE with a  $5^\circ$  window) was used to analyse each MOF product. The samples were collected using a Si low background sample holder (20mmx0.5mm sample cavity) to minimise background noise. The scans were collected over a 2theta range of  $5-60^\circ$  at 1 sec/step with 1097 steps in total. Each scan taking 20 mins using DIFFRAC.SUITE COMMANDER software.

K4\_2 observed vs. calc.

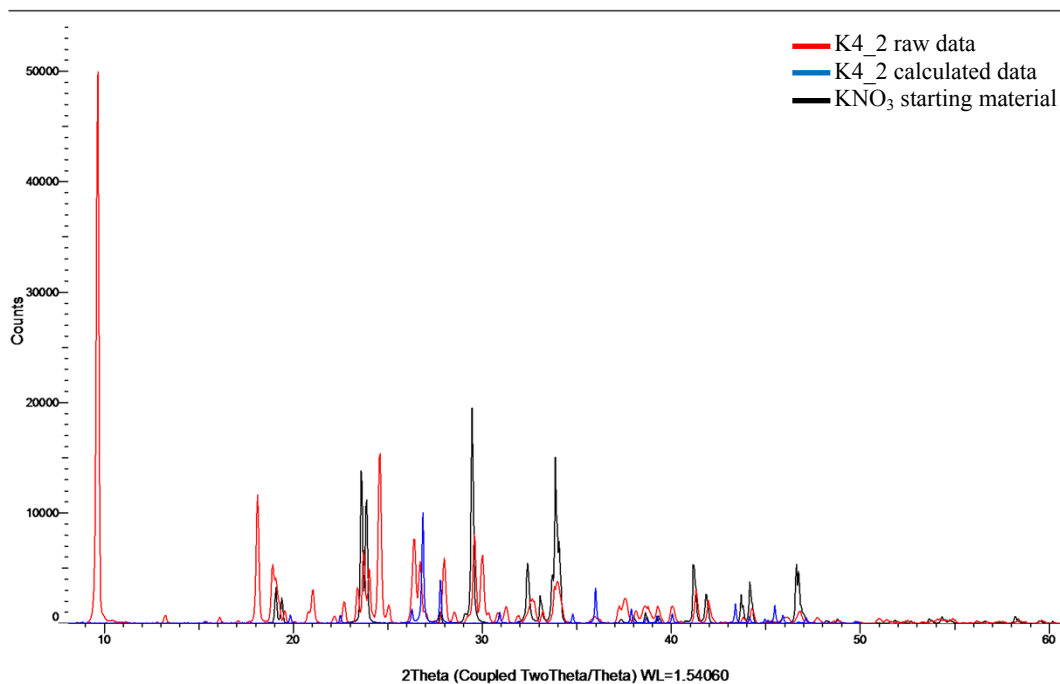

Figure S3 - K4\_2 PXRD observed vs calculated (with Potassium nitrate overlaid)

Within K4\_2 there is an additional unidentified component present within the bulk sample.

Rb4\_2 observed vs. calc.

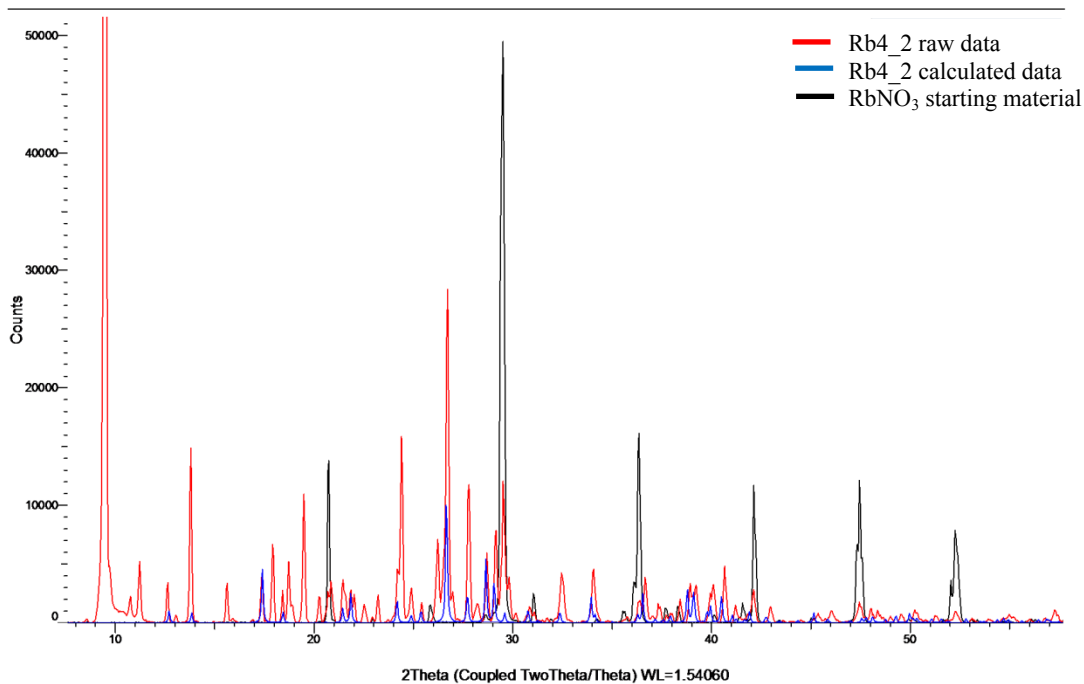

Figure S4 - Rb4\_2 PXRD observed vs calculated (with Rubidium nitrate overlaid)

Cs4\_2 observed vs. calc.

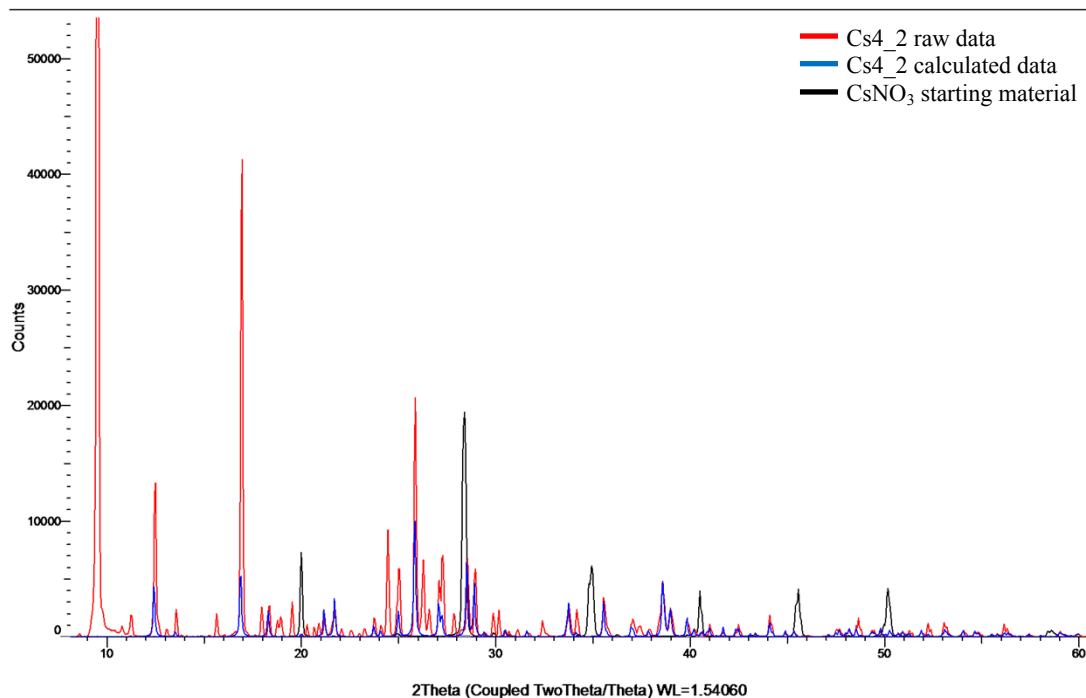

Figure S5 - Cs4\_2 PXRD observed vs calculated (with Cesium nitrate overlaid)

Rubidium nitrate and cesium nitrate products PXRD patterns were overlaid to further emphasise the observations made from overlaying the structures in Mercury where these structures were seen to be isostructural. This is clearly evident from the PXRD patterns (Figure S5 and S6). There is an additional isostructural component present seen in the observed patterns for both Rb\_fBDC and Cs\_fBDC as can be seen in Figure S5 where there are peaks appearing before a 2Theta value of 10°.

Rb fBDC overlaid with Cs fBDC

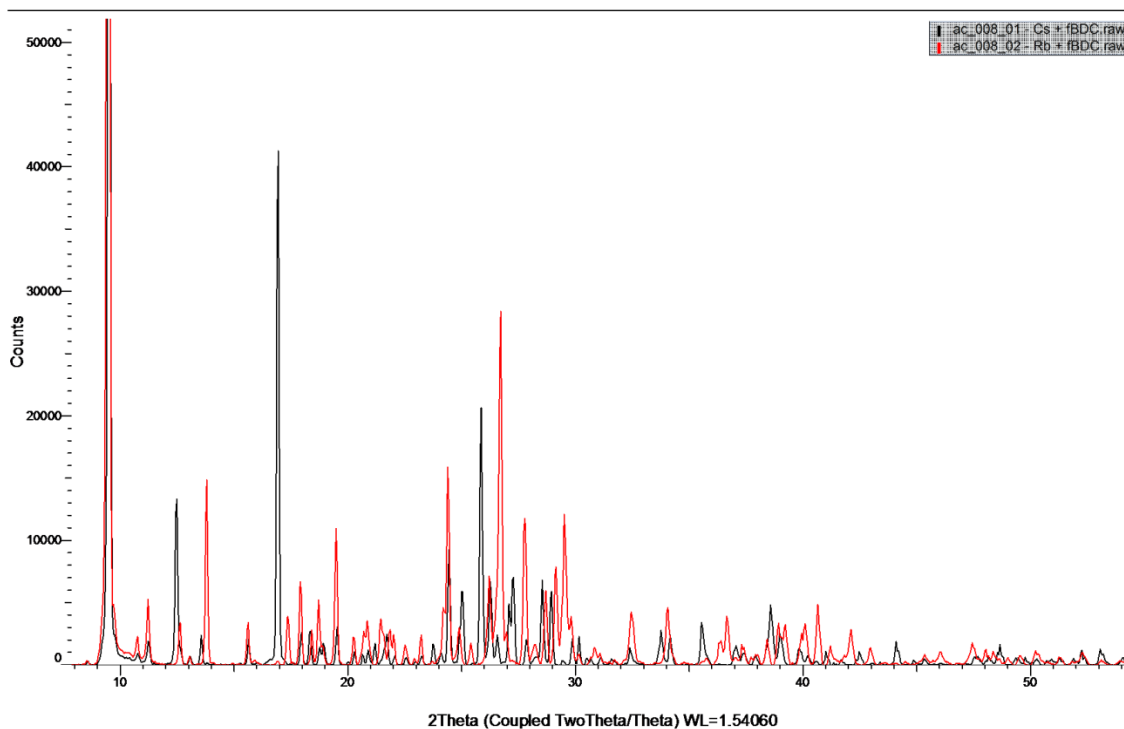

Figure S6 - Rb4\_2 vs Cs4\_2 observed

### Rb4\_2 vs. Cs4\_2 calculated data comparison

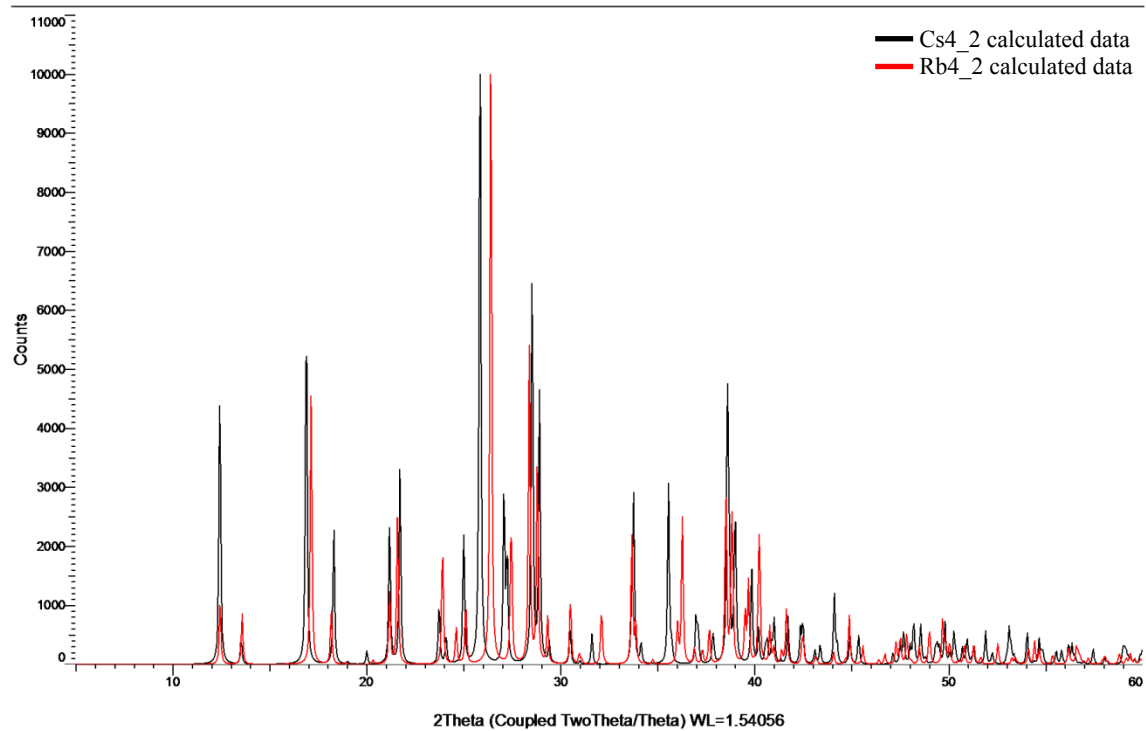

Figure S7 - Rb4 2 vs Cs4 2 calculated

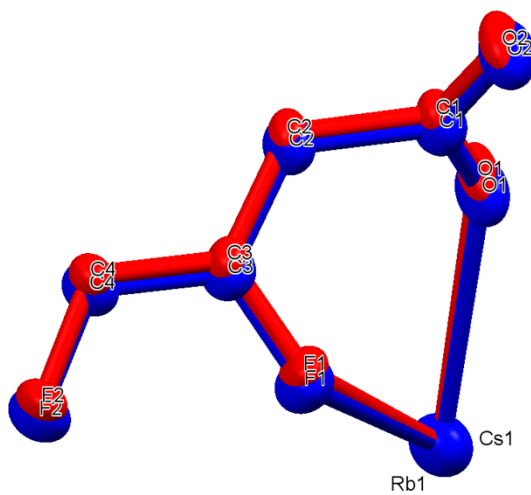

Figure S8 - Structure overlay of Rb4 2 and Cs4 2 in Mercury (Rb = red, Cs = Blue)

### 3.4 DSC Traces (under nitrogen)

The thermal analysis of each Group 1 product coupled with 1,4-fBDC was carried out using a Mettler-Toledo differential scanning calorimeter instrument, model DSC821e, equipped with a liquid nitrogen low temperature attachment and a TSO801RO Universal sample robot (heating rate:  $10^{\circ}\text{Cmin}^{-1}$ ; the flow rate of nitrogen gas: 40ml/min; the sample size: 4 – 10mg in 40 $\mu\text{l}$  aluminium dishes).

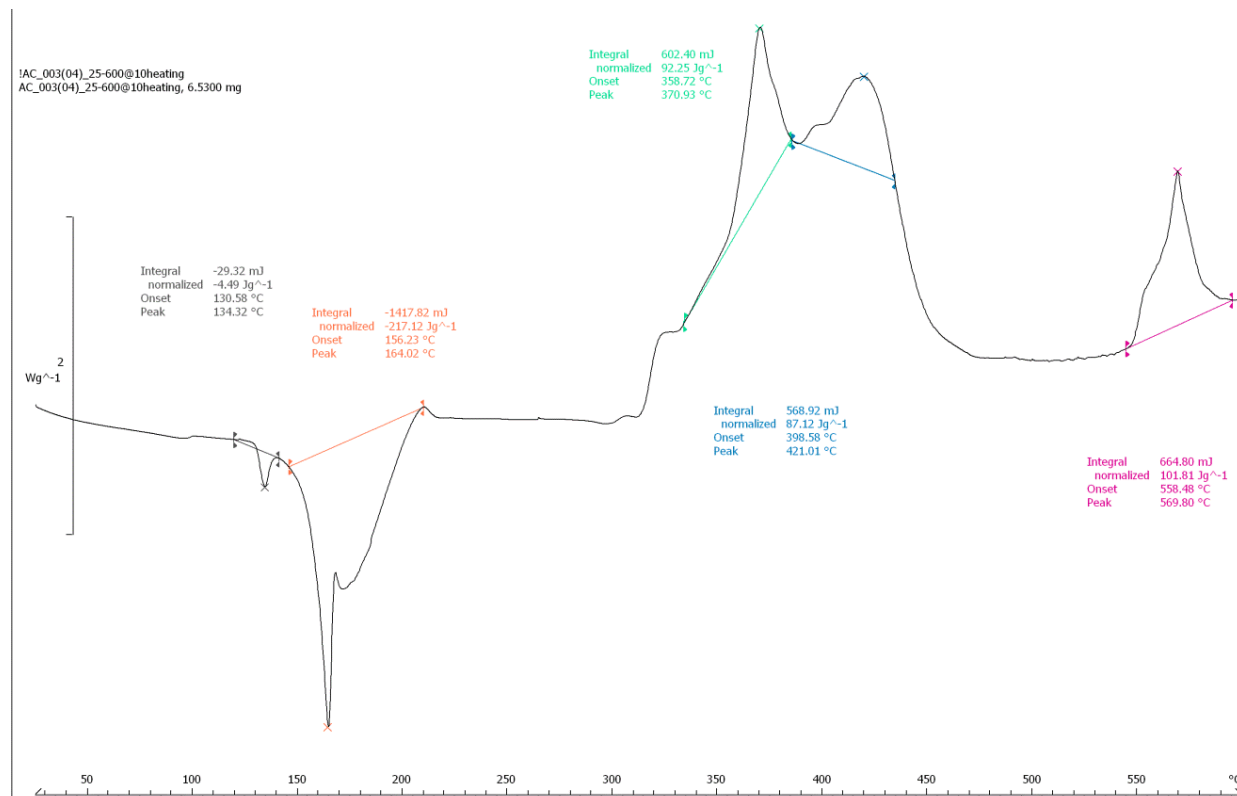

Figure S9 – K4\_2\_DSC trace

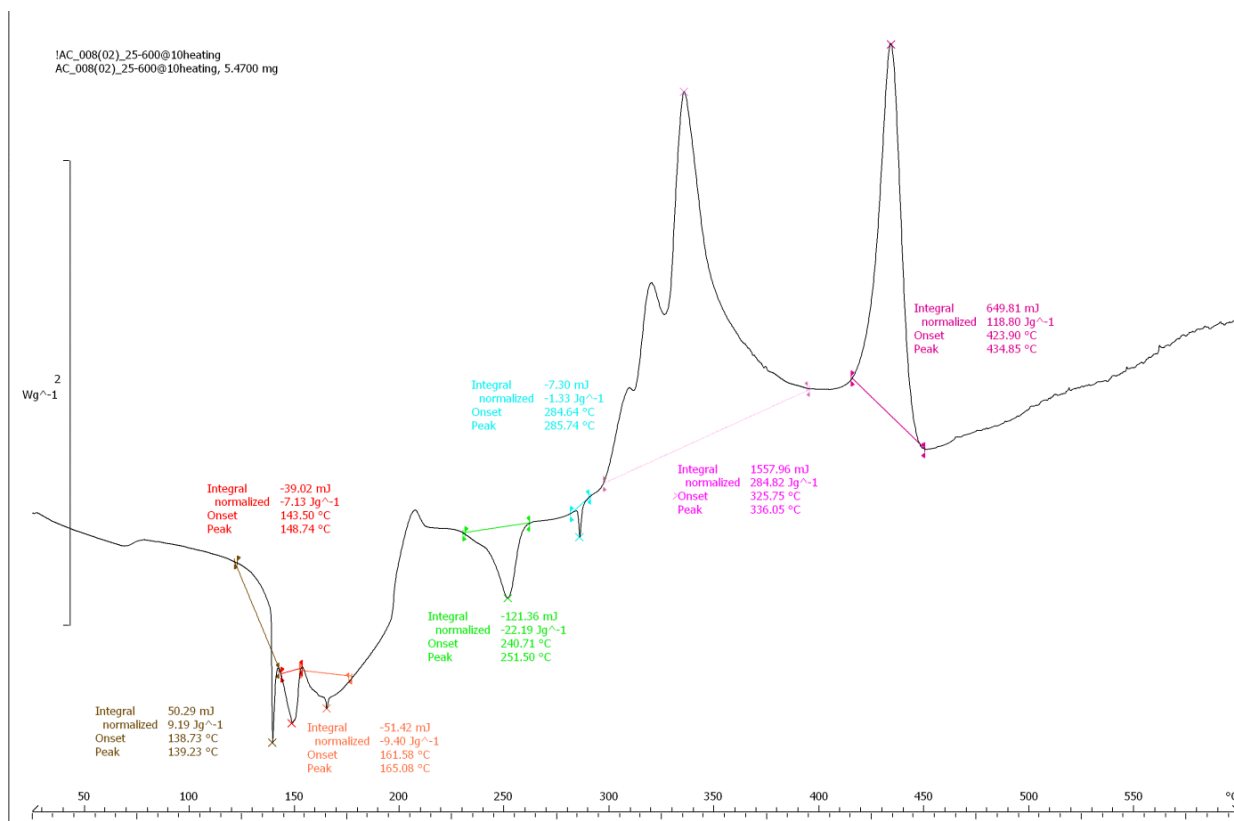

Figure S10 – Rb4\_2 DSC trace

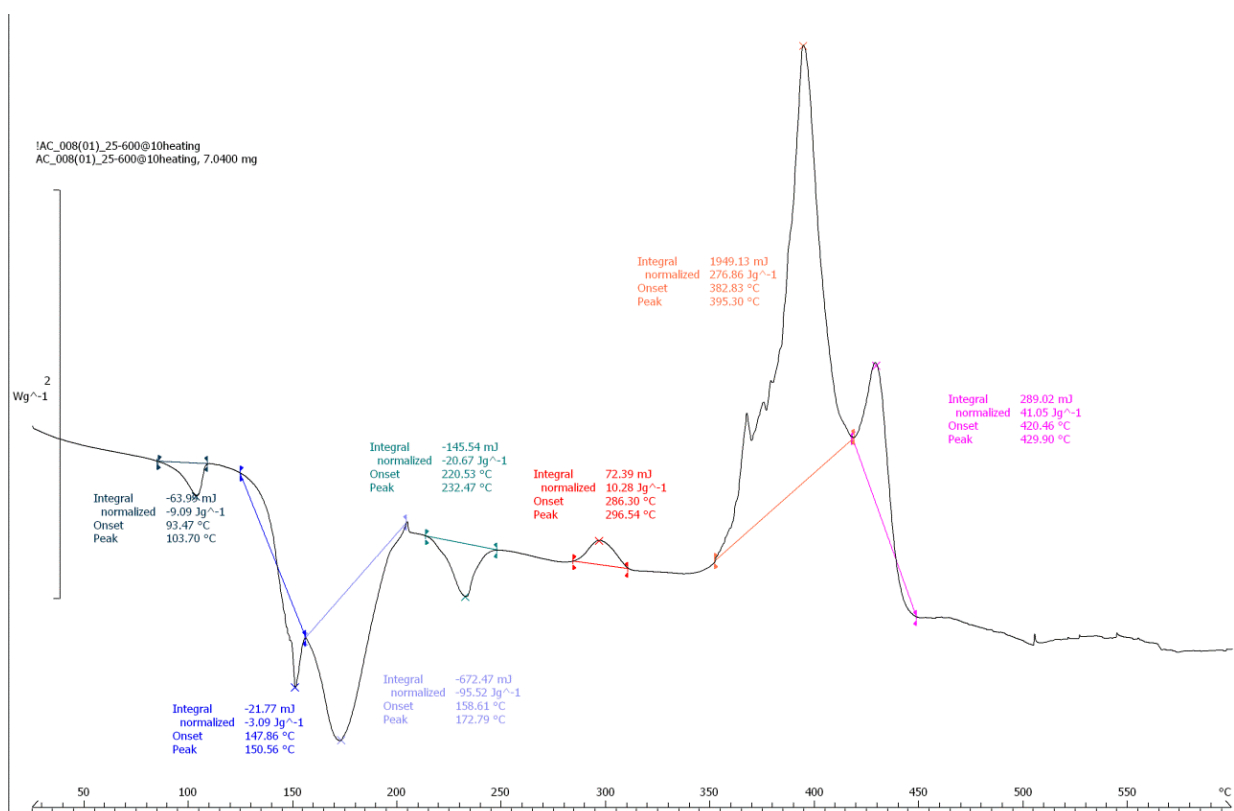

Figure S11 – Cs4\_2 DSC trace

### 3.5 Burn Tests

The alkaline earth metal MOFs were burn tested within a fume hood on top of a heat proof mat which had a small enclosure mounted on top of it to minimise the effects of the airflow on the burn test. Approximately 15mg of sample was placed onto a heat proof tile and ignited using a blow torch. Photographs were taken by Sharif Ahmed using a Canon EOS 7D camera (exposure 1/100 sec).

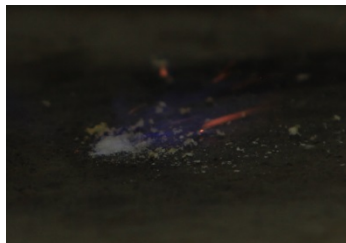

Figure S12 - Burn Test of K4\_2

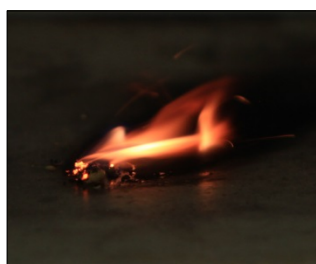

Figure S13 - Burn Test of Rb4\_2

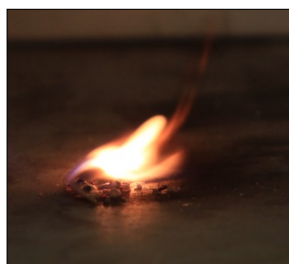

Figure S14 - Burn Test of Cs4\_2



## 4. Group 2 MOF Results

### 4.1 Single-crystal X-ray diffraction analyses

Single-crystal X-ray diffraction data for **Ba4\_1/2**, **Ca4\_2**, **Sr4\_2**, **Sr5\_1**, **Sr5\_2**, **Ca6\_2**, **Sr6\_1**, **Sr6\_2**, and **Ba6\_2** were collected at 100K on a Rigaku AFC12 goniometer equipped with an enhanced sensitivity (HG) Saturn 724+ detector mounted at the window of an FR-E+ Superbright Mo K $\alpha$  rotating anode generator with optics VHF Varimax 70 $\mu$ m focus and equipped with an Oxford CryosystemsCobra<sup>19</sup> cooling device. Cell determination, data collection, data reduction, cell refinement and absorption corrections were carried out using CrystalClear-SM Expert 3.1 b27 software.<sup>20</sup> Both **Ca6\_2** and **Sr6\_2** were processed using CrysAlis Pro (Agilent Technologies V1.171.37.35).<sup>[5]</sup> All structures were solved using Superflip<sup>21</sup>. All structures were refined using full-matrix least-squares refinements in the SHELX2013 software<sup>22</sup>. All non-hydrogen atoms were refined with anisotropic displacement parameters. All hydrogen atoms were added at calculated positions and refined using a riding model with isotropic displacement parameters based on the equivalent isotropic displacement parameter (Ueq) of the parent atom.

| Identification code                                        | <b>Ba4_1/2</b>                                                               | <b>Ca4_2</b>                                                                  | <b>Sr4_2</b>                                                                  |
|------------------------------------------------------------|------------------------------------------------------------------------------|-------------------------------------------------------------------------------|-------------------------------------------------------------------------------|
| <b>Empirical formula</b>                                   | C <sub>16</sub> H <sub>2</sub> Ba <sub>2</sub> F <sub>8</sub> O <sub>9</sub> | C <sub>13</sub> H <sub>8</sub> CaF <sub>4</sub> N <sub>2</sub> O <sub>8</sub> | C <sub>13</sub> H <sub>8</sub> SrF <sub>4</sub> N <sub>2</sub> O <sub>8</sub> |
| <b>Formula weight</b>                                      | 764.86                                                                       | 436.29                                                                        | 483.83                                                                        |
| <b>Temperature (K)</b>                                     | 100(2)                                                                       | 100(2)                                                                        | 100(2)                                                                        |
| <b>Wavelength (Å)</b>                                      | 0.71075                                                                      | 0.71075                                                                       | 0.71075                                                                       |
| <b>Crystal system</b>                                      | Monoclinic                                                                   | Orthorhombic                                                                  | Orthorhombic                                                                  |
| <b>Space group</b>                                         | C2/c                                                                         | Pna21                                                                         | Pna21                                                                         |
| <i>Unit cell dimensions</i>                                |                                                                              |                                                                               |                                                                               |
| <b>a (Å)</b>                                               | 12.5647(9)                                                                   | 14.2384(10)                                                                   | 14.2686(10)                                                                   |
| <b>b (Å)</b>                                               | 7.1406(5)                                                                    | 16.3862(11)                                                                   | 16.7326(11)                                                                   |
| <b>c (Å)</b>                                               | 19.8230(14)                                                                  | 6.8450(5)                                                                     | 7.0181(5)                                                                     |
| <b><math>\alpha</math> (°)</b>                             | 90                                                                           | 90                                                                            | 90                                                                            |
| <b><math>\beta</math> (°)</b>                              | 101.663(2)                                                                   | 90                                                                            | 90                                                                            |
| <b><math>\gamma</math> (°)</b>                             | 90                                                                           | 90                                                                            | 90                                                                            |
| <b>Volume/Å<sup>3</sup></b>                                | 1741.8(2)                                                                    | 1597.03(19)                                                                   | 1675.6(2)                                                                     |
| <b>Z</b>                                                   | 4                                                                            | 4                                                                             | 4                                                                             |
| <b><math>\rho_{\text{calc}}</math> (mg/mm<sup>3</sup>)</b> | 2.917                                                                        | 1.815                                                                         | 1.918                                                                         |
| <b>Absorption coefficient (mm<sup>-1</sup>)</b>            | 4.637                                                                        | 0.488                                                                         | 3.309                                                                         |
| <b>F(000)</b>                                              | 1416                                                                         | 880                                                                           | 952                                                                           |
| <b>Crystal</b>                                             | Plate; Colourless                                                            | Block; Colourless                                                             | Plate; Colourless                                                             |
| <b>Crystal size (mm<sup>3</sup>)</b>                       | 0.040 x 0.030 x 0.010                                                        | 0.070 x 0.060 x 0.040                                                         | 0.110 x 0.040 x 0.030                                                         |
| <b><math>\theta</math> range for data collection (°)</b>   | 3.299 – 27.483                                                               | 2.861 – 27.487                                                                | 2.822 – 27.529                                                                |
| <b>Reflections collected</b>                               | 10971                                                                        | 19489                                                                         | 17674                                                                         |
| <b>Independent reflections</b>                             | 2001 [0.0504]                                                                | 3646 [0.0518]                                                                 | 3743 [0.0589]                                                                 |
| <b>Completeness to <math>\theta</math> max</b>             | 99.9 %                                                                       | 99.7 %                                                                        | 98.3 %                                                                        |
| <b>Max and min transmission</b>                            | 1.000 and 0.737                                                              | 1.000 and 0.779                                                               | 1.000 and 0.794                                                               |
| <b>Data/restraints/parameters</b>                          | 2001 / 0 / 159                                                               | 3646 / 1 / 258                                                                | 3743 / 1 / 257                                                                |
| <b>Goodness-of-fit on F2</b>                               | 1.043                                                                        | 1.042                                                                         | 1.030                                                                         |
| <b>Final R indexes [<math>I \geq 2\sigma(I)</math>]</b>    | R1 = 0.0222,<br>wR2 = 0.0536                                                 | R1 = 0.0354,<br>wR2 = 0.0913                                                  | R1 = 0.0372,<br>wR2 = 0.1031                                                  |
| <b>Final R indexes [all data]</b>                          | R1 = 0.0259,<br>wR2 = 0.0554                                                 | R1 = 0.0366,<br>wR2 = 0.0923                                                  | R1 = 0.0377,<br>wR2 = 0.1038                                                  |
| <b>Largest diff. peak/hole (e Å<sup>-3</sup>)</b>          | 0.897/-0.687                                                                 | 0.458/-0.213                                                                  | 0.659/-0.489                                                                  |
| <b>CCDC deposition number/reference code</b>               | 1046526                                                                      | 1046528                                                                       | 1046533                                                                       |

| Identification code                               | Sr5_1                                                             | Sr5_2                                                                          | Ca6_2                                                                         |
|---------------------------------------------------|-------------------------------------------------------------------|--------------------------------------------------------------------------------|-------------------------------------------------------------------------------|
| <b>Empirical formula</b>                          | C <sub>11</sub> H <sub>15</sub> F <sub>4</sub> NO <sub>9</sub> Sr | C <sub>13</sub> H <sub>8</sub> F <sub>4</sub> N <sub>2</sub> O <sub>8</sub> Sr | C <sub>13</sub> H <sub>6</sub> CaF <sub>4</sub> N <sub>2</sub> O <sub>7</sub> |
| <b>Formula weight</b>                             | 468.86                                                            | 483.83                                                                         | 418.28                                                                        |
| <b>Temperature (K)</b>                            | 100(2)                                                            | 100(2)                                                                         | 100(2)                                                                        |
| <b>Wavelength (Å)</b>                             | 0.71075                                                           | 0.71075                                                                        | 0.71075                                                                       |
| <b>Crystal system</b>                             | Triclinic                                                         | Triclinic                                                                      | Monoclinic                                                                    |
| <b>Space group</b>                                | <i>P</i> −1                                                       | <i>P</i> −1                                                                    | <i>P</i> 2 <sub>1</sub> / <i>n</i>                                            |
| <i>Unit cell dimensions</i>                       |                                                                   |                                                                                |                                                                               |
| <b>a (Å)</b>                                      | 8.8263(7)                                                         | 7.3008(5)                                                                      | 4.4398(3)                                                                     |
| <b>b (Å)</b>                                      | 8.9293(7)                                                         | 9.1264(5)                                                                      | 23.0380(18)                                                                   |
| <b>c (Å)</b>                                      | 10.8630(9)                                                        | 13.1904(9)                                                                     | 14.3878(9)                                                                    |
| <b>α (°)</b>                                      | 92.612(16)                                                        | 101.118(6)                                                                     | 90                                                                            |
| <b>β (°)</b>                                      | 93.939(17)                                                        | 93.830(5)                                                                      | 96.661(6)                                                                     |
| <b>γ (°)</b>                                      | 100.991(18)                                                       | 110.526(6)                                                                     | 90                                                                            |
| <b>Volume/Å<sup>3</sup></b>                       | 836.95(13)                                                        | 798.95(9)                                                                      | 1461.69(17)                                                                   |
| <b>Z</b>                                          | 2                                                                 | 2                                                                              | 4                                                                             |
| <b>ρ<sub>calc</sub> (mg/mm<sup>3</sup>)</b>       | 1.860                                                             | 2.011                                                                          | 1.901                                                                         |
| <b>Absorption coefficient (mm<sup>−1</sup>)</b>   | 3.311                                                             | 3.469                                                                          | 0.524                                                                         |
| <b>F(000)</b>                                     | 468                                                               | 476                                                                            | 840                                                                           |
| <b>Crystal</b>                                    | Plate; Colourless                                                 | Block; Colourless                                                              | Needle; Colourless                                                            |
| <b>Crystal size (mm<sup>3</sup>)</b>              | 0.060 × 0.040 × 0.010                                             | 0.140 × 0.040 × 0.020                                                          | 0.130 × 0.010 × 0.010                                                         |
| <b>θ range for data collection (°)</b>            | 2.899 – 27.554                                                    | 3.012 – 27.488                                                                 | 1.677 – 27.483                                                                |
| <b>Reflections collected</b>                      | 11298                                                             | 10036                                                                          | 18914                                                                         |
| <b>Independent reflections</b>                    | 3861 [0.1280]                                                     | 3656 [0.0868]                                                                  | 3350 [0.1066]                                                                 |
| <b>Completeness to θ max</b>                      | 99.8 %                                                            | 99.7 %                                                                         | 100.0 %                                                                       |
| <b>Max and min transmission</b>                   | 1.000 and 0.289                                                   | 1.000 and 0.253                                                                | 1.000 and 0.221                                                               |
| <b>Data/restraints/parameters</b>                 | 3861 / 0 / 243                                                    | 3656 / 0 / 254                                                                 | 3350 / 0 / 248                                                                |
| <b>Goodness-of-fit on F<sup>2</sup></b>           | 1.009                                                             | 1.036                                                                          | 1.095                                                                         |
| <b>Final R indexes [I&gt;=2σ (I)]</b>             | R1 = 0.0858,<br>wR2 = 0.2044                                      | R1 = 0.0574,<br>wR2 = 0.1482                                                   | R1 = 0.0594,<br>wR2 = 0.1281                                                  |
| <b>Final R indexes [all data]</b>                 | R1 = 0.1114,<br>wR2 = 0.2221                                      | R1 = 0.0605,<br>wR2 = 0.1525                                                   | R1 = 0.1085,<br>wR2 = 0.1623                                                  |
| <b>Largest diff. peak/hole (e Å<sup>−3</sup>)</b> | 2.981/−1.807                                                      | 1.667/−2.458                                                                   | 0.550/−0.636                                                                  |
| <b>CCDC deposition number/reference code</b>      | 1046534                                                           | 1046535                                                                        | 1046527                                                                       |

| Identification code                               | Sr6_1                                                             | Sr6_2                                                                                          | Ba6_2*                                                                                        |
|---------------------------------------------------|-------------------------------------------------------------------|------------------------------------------------------------------------------------------------|-----------------------------------------------------------------------------------------------|
| <b>Empirical formula</b>                          | C <sub>11</sub> H <sub>10</sub> F <sub>4</sub> NO <sub>6</sub> Sr | C <sub>42</sub> H <sub>20</sub> F <sub>16</sub> N <sub>2</sub> O <sub>20</sub> Sr <sub>3</sub> | C <sub>26</sub> H <sub>18</sub> Ba <sub>2</sub> F <sub>8</sub> N <sub>2</sub> O <sub>11</sub> |
| <b>Formula weight</b>                             | 415.82                                                            | 1439.46                                                                                        | 961.10                                                                                        |
| <b>Temperature (K)</b>                            | 100(2)                                                            | 100(2)                                                                                         | 100(2)                                                                                        |
| <b>Wavelength (Å)</b>                             | 0.71075                                                           | 0.71075                                                                                        | 0.71075                                                                                       |
| <b>Crystal system</b>                             | Triclinic                                                         | Monoclinic                                                                                     | Monoclinic                                                                                    |
| <b>Space group</b>                                | <i>P</i> -1                                                       | <i>C</i> 2                                                                                     | <i>P</i> 2 <sub>1</sub> / <i>n</i>                                                            |
| <i>Unit cell dimensions</i>                       |                                                                   |                                                                                                |                                                                                               |
| <b>a (Å)</b>                                      | 6.1469(4)                                                         | 32.076(3)                                                                                      | 7.0904(5)                                                                                     |
| <b>b (Å)</b>                                      | 7.0452(5)                                                         | 6.1638(3)                                                                                      | 32.270(2)                                                                                     |
| <b>c (Å)</b>                                      | 16.1438(11)                                                       | 11.5618(7)                                                                                     | 7.2698(5)                                                                                     |
| <b>α (°)</b>                                      | 94.495(16)                                                        | 90                                                                                             | 90                                                                                            |
| <b>β (°)</b>                                      | 96.741(16)                                                        | 97.569(7)                                                                                      | 117.997(2)                                                                                    |
| <b>γ (°)</b>                                      | 101.639(17)                                                       | 90                                                                                             | 90                                                                                            |
| <b>Volume/Å<sup>3</sup></b>                       | 676.26(9)                                                         | 2266.0(3)                                                                                      | 1468.72(17)                                                                                   |
| <b>Z</b>                                          | 2                                                                 | 2                                                                                              | 2                                                                                             |
| <b>ρ<sub>calc</sub> (mg/mm<sup>3</sup>)</b>       | 2.042                                                             | 2.110                                                                                          | 2.173                                                                                         |
| <b>Absorption coefficient (mm<sup>-1</sup>)</b>   | 4.067                                                             | 3.672                                                                                          | 2.781                                                                                         |
| <b>F(000)</b>                                     | 410                                                               | 1408                                                                                           | 920                                                                                           |
| <b>Crystal</b>                                    | Needle; Colourless                                                | Plate; Colourless                                                                              | Prism; Colourless                                                                             |
| <b>Crystal size (mm<sup>3</sup>)</b>              | 0.040 × 0.020 ×<br>0.010                                          | 0.160 × 0.030 ×<br>0.010                                                                       | 0.040 × 0.020 ×<br>0.010                                                                      |
| <b>θ range for data collection (°)</b>            | 3.106 – 27.473                                                    | 1.777 – 27.545                                                                                 | 2.525 – 27.483                                                                                |
| <b>Reflections collected</b>                      | 7817                                                              | 14120                                                                                          | 17867                                                                                         |
| <b>Independent reflections</b>                    | 3016 [0.1512]                                                     | 5028 [0.0584]                                                                                  | 3366 [0.0663]                                                                                 |
| <b>Completeness to θ max</b>                      | 99.1 %                                                            | 99.9 %                                                                                         | 99.9 %                                                                                        |
| <b>Max and min transmission</b>                   | 1.000 and 0.468                                                   | 1.000 and 0.423                                                                                | 1.000 and 0.769                                                                               |
| <b>Data/restraints/parameters</b>                 | 3016 / 0 / 211                                                    | 5028 / 328 / 376                                                                               | 3366 / 0 / 239                                                                                |
| <b>Goodness-of-fit on F<sup>2</sup></b>           | 0.989                                                             | 1.160                                                                                          | 1.037                                                                                         |
| <b>Final R indexes [I&gt;=2σ (I)]</b>             | R1 = 0.1003,<br>wR2 = 0.1915                                      | R1 = 0.0838,<br>wR2 = 0.2130                                                                   | R1 = 0.0360,<br>wR2 = 0.0814                                                                  |
| <b>Final R indexes [all data]</b>                 | R1 = 0.1912,<br>wR2 = 0.2308                                      | R1 = 0.0906,<br>wR2 = 0.2190                                                                   | R1 = 0.0477,<br>wR2 = 0.0867                                                                  |
| <b>Largest diff. peak/hole (e Å<sup>-3</sup>)</b> | 1.294/−0.754                                                      | 1.908/−2.311                                                                                   | 0.732/−1.031                                                                                  |
| <b>CCDC deposition number/reference code</b>      | 1046531                                                           | 1046532                                                                                        | 1046525                                                                                       |

**Table S2 - Group 2 Fluorinated Products SXRD Data**

\*Ba6\_2 - Ba atoms are disordered over two positions. Due to this it is impossible to model the exact positions of the lighter atoms resulting in some close contacts that can safely be ignored.

## 4.2 Structure Discussion

### Ba4\_1/2

Complex Ba4\_1/2 crystallises in the monoclinic C2/c space group as a 3D non-porous metal-organic framework. The asymmetric unit is made up of one Ba(II) atom, two half 1,4-fBDC ligands and one coordinated water. The Ba ion is coordinated to seven O ions from six carboxylate groups (one bidentate and five monodentate) associated with the fBDC ligands and one water O ion. One carboxylate (O1—C1—O2) is bidentate to one barium and monodentate to two others. The other carboxylate (O11—C11—O12) is monodentate to three bariums. One of the oxygens, O12, is monodentate to one barium ion whilst the other, O11, is monodentate to two. The Ba coordination geometry is that of a distorted dodecahedron, a common structure for eight-coordinate metal ions. Ba-O bond distances range from 2.686(2) – 2.957(2) Å. These values are comparable to those listed for Ba-O (carboxylate) and Ba-O (aqua) bonds in other eight coordinate barium coordination polymers.<sup>[6]</sup> Ba(OH<sub>2</sub>)(COO)<sub>6</sub> link together to create 2D sheets which are cross-linked through the 1,4-fBDC linkers along the crystallographic c axis. The 1,4-fBDC linkers lie roughly parallel to one another between each sheet but on moving from one sheet to the next they rotate by 73°. Each Ba(II) acts as a node joining four COO groups. One carboxylate bridges two adjacent Ba(II) ions whilst the other bridges three. This 3D MOF has been determined by PLATON to have no solvent accessible voids.<sup>[4]</sup> This structure was particularly interesting as the same product resulted irrespective of the synthesis method chosen.

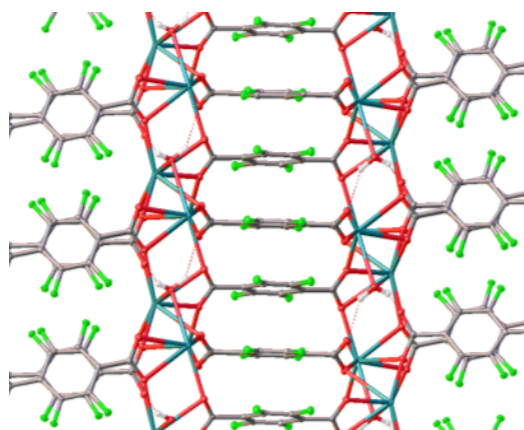

Figure S15 - Ba4\_2 SXR

### Ca4\_2/Sr4\_2

Complexes Ca4\_2 and Sr4\_2 crystallise in the orthorhombic Pna2<sub>1</sub> space group as 3D porous metal-organic frameworks. The asymmetric unit is made up of a Ca/Sr(II) atom, one 1,4-fBDC ligand, a nitrate anion, a coordinated water molecule and pyridine solvent. The Ca/Sr(II) atom is coordinated to six O atoms from four carboxylate groups (two bidentate (O1, O2, O3, O4) and two monodentate (O1, O2) associated with the 1,4-fBDC ligands, one O from a nitrate anion (O13), and one O from a coordinated water (O1W). The Ca(II) coordination geometry is that of a biaugmented triangular prism. Ca-O bond distances range from 2.395(2) – 2.618(2) Å (Sr = 2.488(4) – 2.726(3) Å). These values are comparable to those listed for Ca-O/Sr-O (carboxylate) and Ca-O/Sr-O (aqua) bonds in other eight coordinate calcium/strontium coordination polymers.<sup>[7]</sup> Ca/Sr(OH<sub>2</sub>)(COO)<sub>4</sub> link together to create 1D chains which are cross-linked through 1,4-fBDC linkers in two directions to create a 3D MOF. Pyridine resides in the pores of this structure.

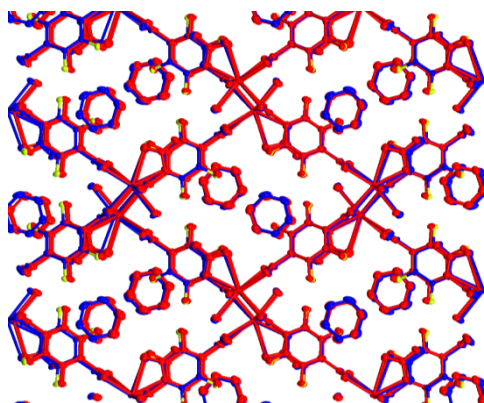

Figure S16 - Ca4\_2/Sr4\_2 SXR

### Sr5\_1

Sr5\_1 crystallises in the triclinic P-1 space group. It is composed of 1D chains constructed from Sr ions linked by 1,3-fBDC ligands. The asymmetric unit consists of one Sr ion, one 1,3-fBDC ligand, one coordinated DMF molecule, three coordinated water molecules and one solvent water molecule. Sr is in an eight coordinate system with biaugmented triangular prism geometry. Sr is bonded in a bidentate fashion to one iso fBDC ligand (O1, O2) and monodentate to two other 1,3-fBDC ligands (O1, O3), three coordinated water molecules (O1W, O2W, O3W), and one coordinated DMF molecule (O1S). Sr-O bond distances range from 2.499(5) – 2.750(5) Å. These values are comparable to those listed for Sr-O (carboxylate) and Sr-O (aqua) bonds in other eight coordinate strontium coordination polymers.<sup>[7d]</sup> Sr(OH<sub>2</sub>)<sub>3</sub>(DMF)(COO)<sub>3</sub> chains which form along crystallographic *a* axis are extended into a 2D supramolecular network by means of hydrogen bonding which takes place between coordinated water molecules.

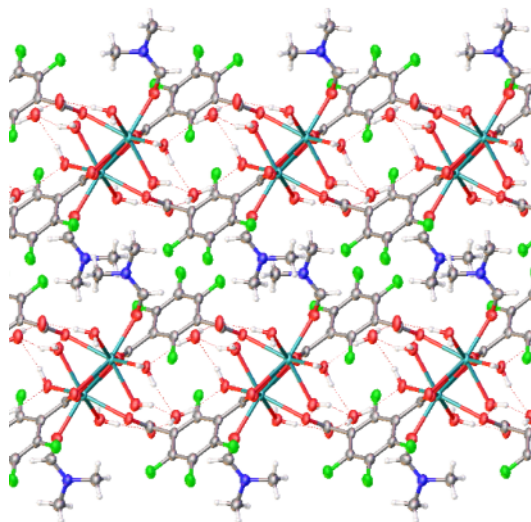

Figure S17 - Sr5\_1 SXRD

### Sr5\_2

Sr5\_2 crystallises in the orthorhombic Pna21 space group consisting of 2D sheets constructed from Sr ions linked by 1,3-fBDC ligands. The asymmetric unit consists of one Sr ion, one 1,3-fBDC ligand, one nitrate anion, and one coordinated water molecule. Sr is in a nine coordinate system with pentagonal bipyrid geometry. One carboxylate from the 1,3-fBDC ligands is  $\mu$ -bridged to two different Sr ions whilst the other carboxylate is bidentate to another Sr ion and monodentate to two others. Sr is bonded in a bidentate fashion to one 1,3-fBDC ligand (O1, O2), and one nitrate anion (O11, O12), and is monodentate to four 1,3-fBDC ligands (O1, O2, O3, O4) and one coordinated water molecule (O1W). Sr-O bond distances range from 2.572(3) – 2.780(3) Å. These values are comparable to those listed for Sr-O (carboxylate) and Sr-O (aqua) bonds in other nine coordinate strontium coordination polymers.<sup>[7d]</sup> Sr(OH<sub>2</sub>)(COO)<sub>5</sub>(NO<sub>3</sub>) chains link together to create 2D sheets by the cross-linking of the isofBDC linkers along the crystallographic *a* axis. Between the 2D sheets lie pyridine molecules which are stabilised by hydrogen bonding to coordinated water molecules (O1W-H1Wa..N1S).

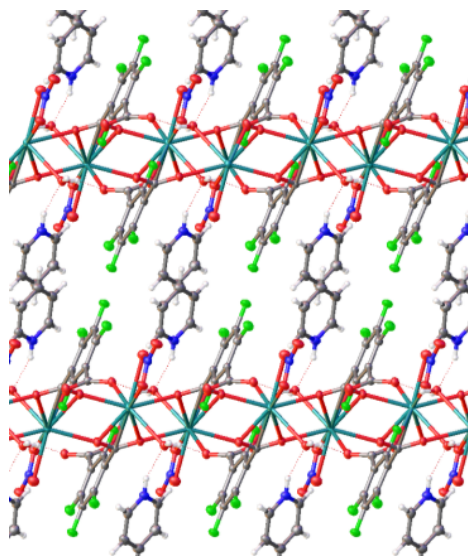

Figure S18 - Sr5\_2 SXR

### Ca6\_2

Ca6\_2 crystallised in the monoclinic P21/n space group. The asymmetric unit consists of a Ca ion, one 1,2-fBDC ligand, one nitrate anion, and one pyridine solvent molecule. Ca is bonded in a bidentate fashion to one 1,2-fBDC ligand (O3, O4) and a nitrate anion (O11, O12), and monodentate bound to four 1,2-fBDC ligands (O1, O2, O2, O4). Ca is in an eight coordinate system with biaugmented triangular prism geometry. Ca-O bond distances range from 2.373(3) – 2.509(3)Å. These values are comparable to those listed for Ca-O(carboxylate) bonds in other eight coordinate calcium coordination polymers.<sup>[7]</sup>Ca(COO)<sub>5</sub>(NO<sub>3</sub>) units link together to form 1D chains along the crystallographic *a* axis. The protonated pyridine molecules hydrogen bond to one of the oxygen atoms from the nitrate anions, O12.

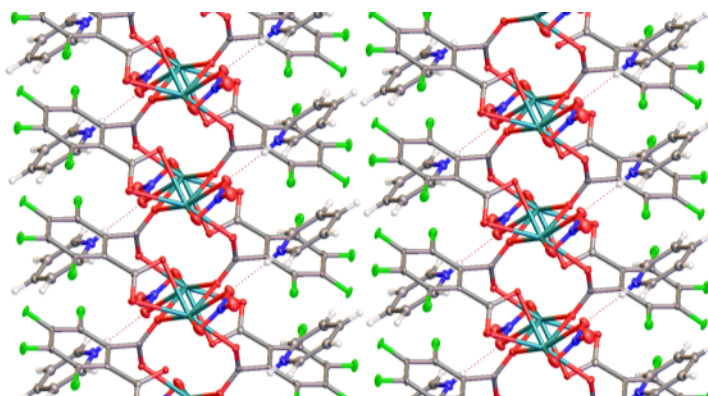

Figure S19 - Ca6\_2 SXR

### Sr6\_1

Sr6\_1 crystallises in the triclinic P-1 space group. The asymmetric unit consists of one Sr ion, one 1,2-fBDC ligand, one coordinated water molecule, and one coordinated DMF molecule. One carboxylate from the 1,2-fBDC ligands is  $\mu$ -bridged to two different Sr ions whilst the other carboxylate is bidentate to another Sr ion and monodentate to two others. Sr is in an eight coordinate system with biaugmented triangular prism geometry. Sr is bonded in a bidentate fashion to one 1,2-fBDC ligand (O1, O2), and is monodentate to four 1,2-fBDC ligands (O1, O2, O3, O4), one coordinated water molecule (O1W) and one DMF molecule (O1S). Sr-O bond distances range from 2.481(7) – 2.777(8)Å. These values are comparable to those listed for Sr-O (carboxylate) and Sr-O (aqua) bonds in other eight coordinate strontium coordination polymers.<sup>[7d]</sup> Sr(OH<sub>2</sub>)(COO)<sub>5</sub>(NO<sub>3</sub>) chains link together to create 2D sheets by cross-linking 1,2-fBDC linkers along the crystallographic *b* axis. The coordinated water provides additional support to one of the oxygens from the  $\mu$ -bridging carboxylate (O1W-H1Wa...O3).



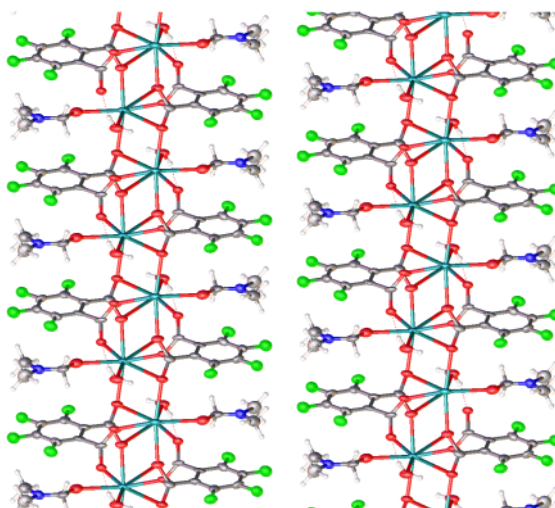

Figure S20 - Sr6\_1 SXR

### Sr6\_2

Sr6\_2 crystallised in the monoclinic space group  $C2$ . There are two unique Sr environments. The asymmetric unit consists of two Sr ions, two 1,2-fBDC ligand, two coordinated water molecules and one pyridine solvent molecule. Sr1 is chelated to two equivalent 1,2-fBDC ligands (O12 x2, O14x2). It is also monodentate bound to two other 1,2-fBDC ligands (O3x2) and two equivalent coordinated water molecules (O1Wx2). Sr2 is chelated to only one 1,2-fBDC (O2, O4) whilst also binding in a bidentate fashion to another 1,2-fBDC (O13, O14). It is also bound to two other inequivalent 1,2-fBDC ligands (O1, O11) and two coordinated water molecules (O1W, O2W). Both Sr cations are eight coordinate with biaugmented triangular prism geometry. Sr-O bond distances range from 2.520(12) – 2.708(13)Å.  $\text{Sr}(\text{OH}_2)_2(\text{COO})_6$  chains link together to create 2D sheets by cross-linking of 1,2-fBDC ligands along the crystallographic c axis.

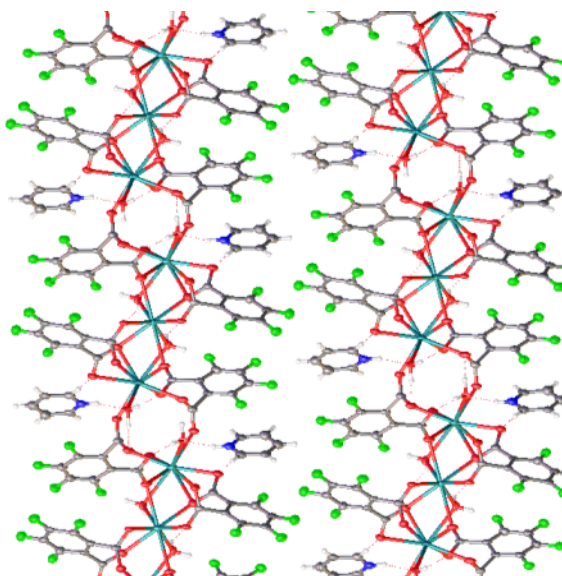

Figure S21 - Sr6\_2 SXR

### Ba6\_2

Ba6\_2 crystallises in the monoclinic  $P2_1/n$  space group consisting of 2D sheets, composed of Ba ion, 1,2-fBDC ligands and coordinated water molecules. The asymmetric unit consists of one Ba ion which is disordered over two positions, one 1,2-fBDC ligand, coordinated water molecules, and one pyridine molecule which is coordinated in one part of structure but is uncoordinated in the other. Both carboxylates associated with the 1,2-fBDC ligands  $\mu$ -bridge to two different Ba ions each. One of the carboxylates additionally binds in a bidentate fashion to another Ba. Ba is in a nine coordinate system with triaugmented triangular prism geometry. Ba is bonded in a bidentate fashion to one 1,2-fBDC ligand (O1, O2) and bonded in a monodentate fashion to three others (O1, O2, O3, O4). In one part the Ba ion is coordinated to three water molecules whereas in the other it is coordinated to two water molecules and a pyridine molecule. Ba-O bond distances range from 2.610(2) – 2.997(3) Å. These values are comparable to those listed for Ba-O (carboxylate) and Ba-O(aqua) in other nine coordinate barium coordination polymers.<sup>[8]</sup> Ba(OH<sub>2</sub>)<sub>3</sub>(COO)<sub>5</sub> chains link together to create 2D sheets down crystallographic b axis.

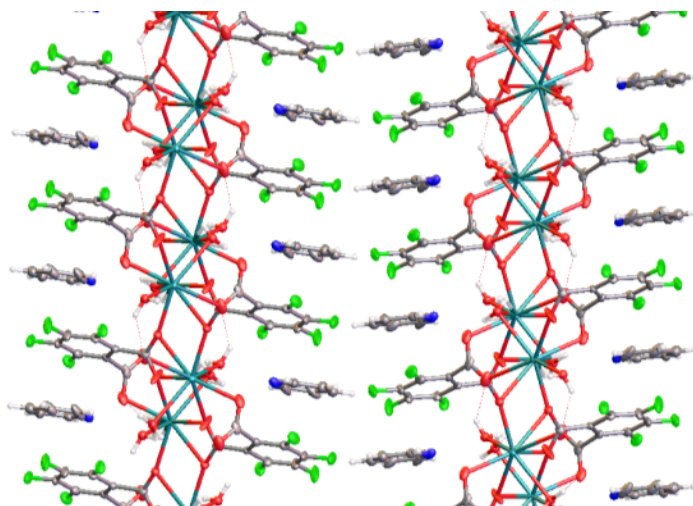

Figure S22 - Ba6\_2 SXRD



### 4.3 Powder X-ray diffraction analyses

The Bruker D2 Phaser benchtop powder XRD system (which uses a (30kv, 10mA) Cu ( $K\alpha_1/K\alpha_2$ ) radiation source and a Ni  $K\beta$  filter (detector side), additional beam optics and settings: primary and secondary axial Soller slits ( $2.5^\circ$ ), fixed 0.6mm divergence slit, 1mm anti-scatter-screen, detector: 1D LYNXEYE with a  $5^\circ$  window) was used to analyse each MOF product. The samples were collected using a Si low background sample holder (20mmx0.5mm sample cavity) to minimise background noise. The scans were collected over a 2theta range of  $5$ - $60^\circ$  at 1 sec/step with 1097 steps in total. Each scan taking 20 mins using DIFFRAC.SUITE COMMANDER software.<sup>[9]</sup>

Ca1\_2 observed vs. calc.

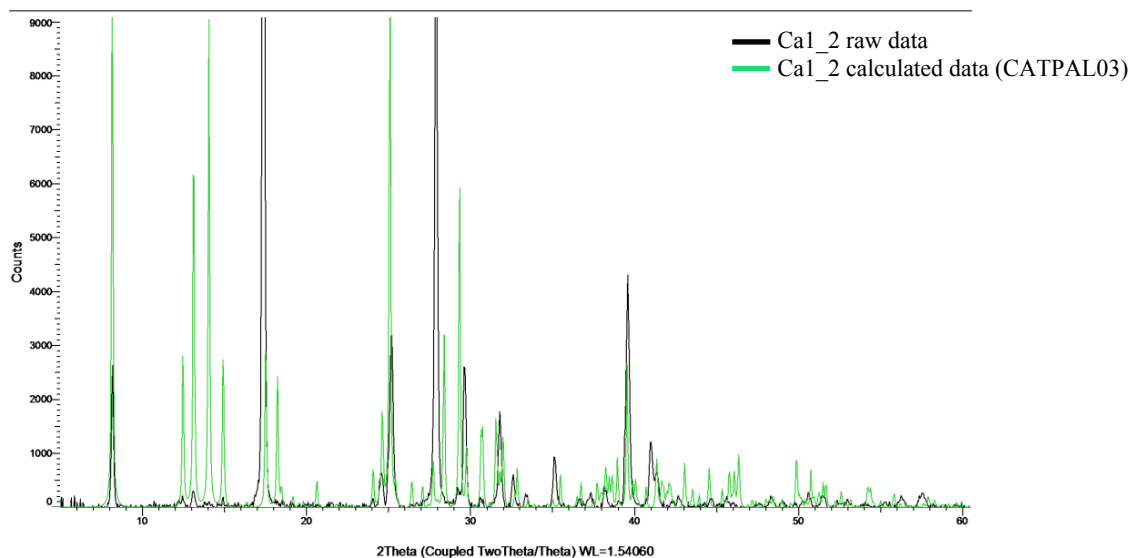

Figure S23 - Ca1\_2 (CATPAL03)

Sr1\_1 observed vs. calc.

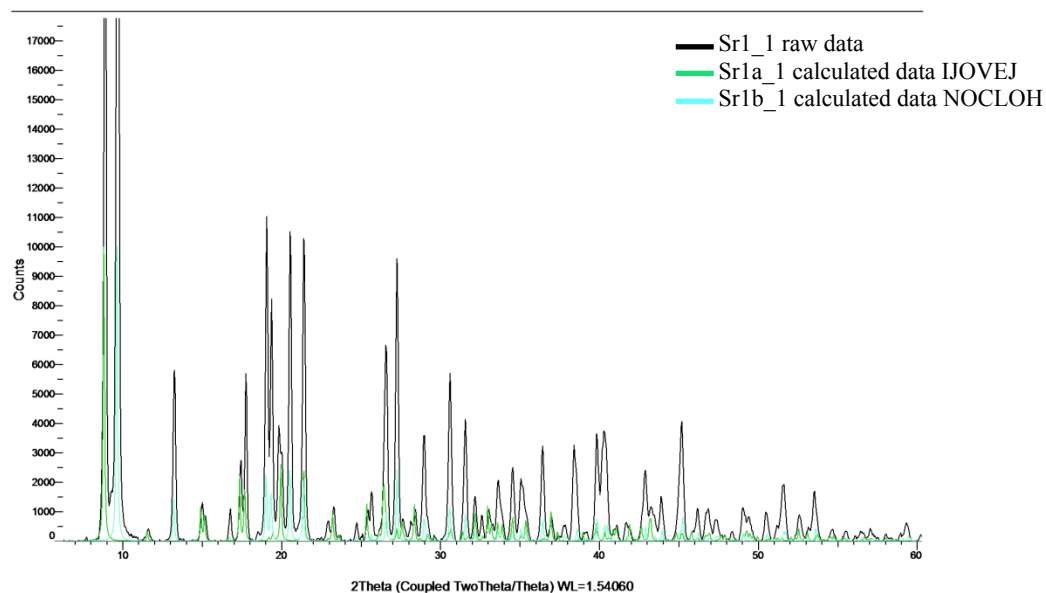

Figure S24 - Sr1\_1 (IJOVEJ + NOCLOH)

Sr1\_2 observed vs. calc.

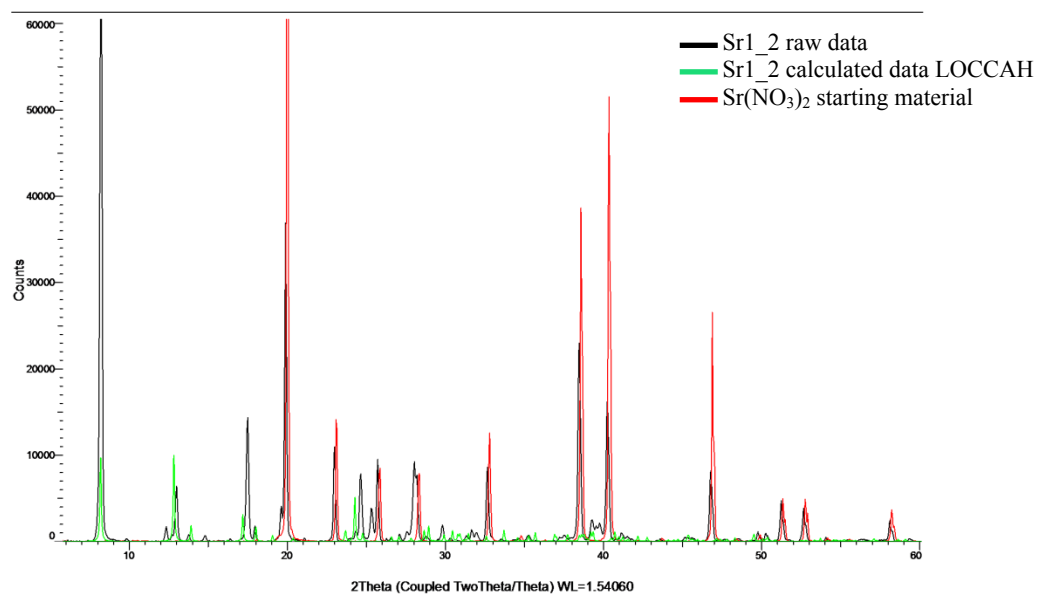

Figure S25 - Sr1\_2 (LOCCA and SM overlay)

Ba1\_2 product overlay with starting material

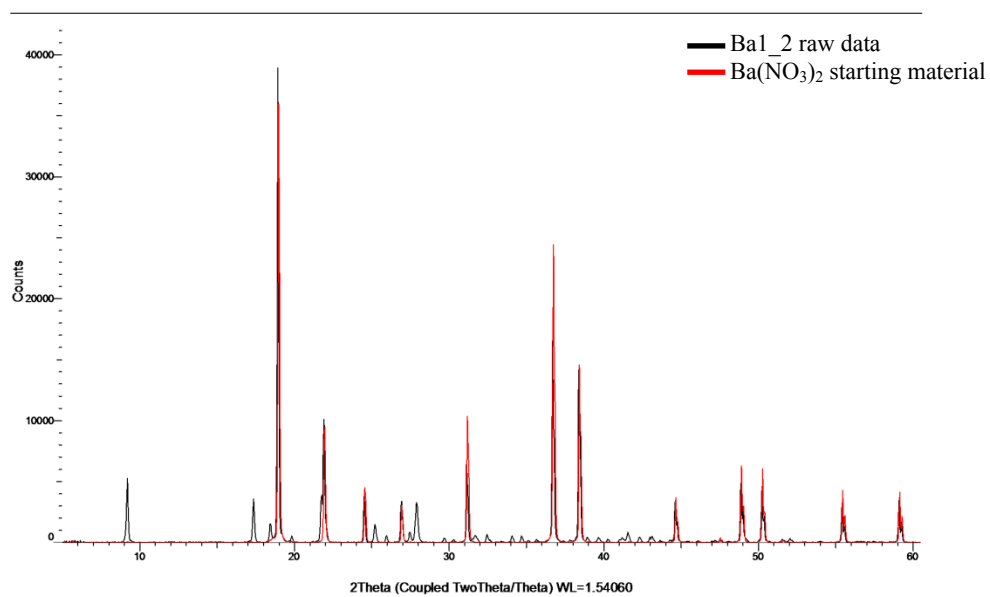

Figure S26 - Ba1\_2 Starting Material Overlay

Ba4\_1 observed vs. calc.

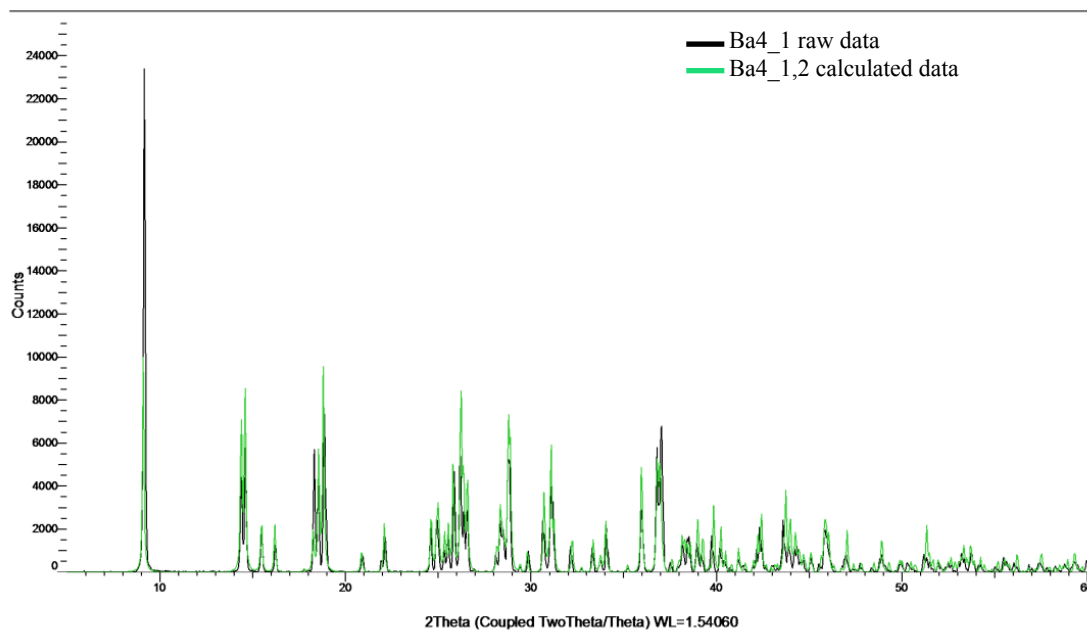

Figure S27- Ba4\_1 observed vs calculated

Ba4\_2 observed vs. calc.

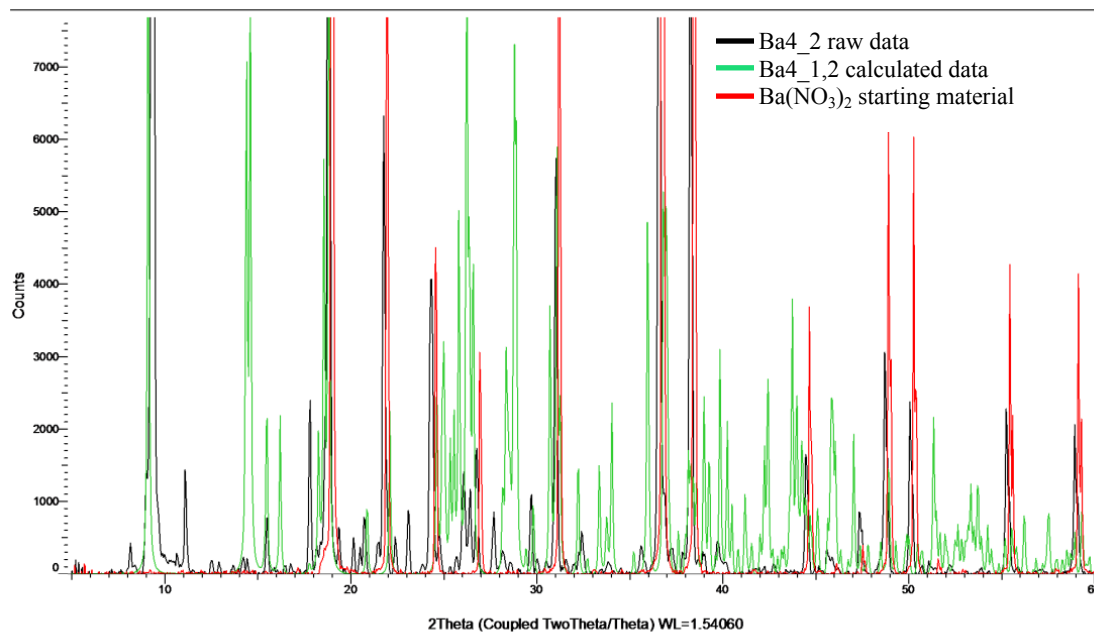

Figure S28 - Ba4\_2 observed vs calculated

As can be seen in Figure S27 the calculated pattern and the observed pattern match up perfectly for the Ba fBDC products resulting from the use of the DMF method. It is clear that when using the MeOH approach there is a large amount of unreacted barium nitrate still present. There was no appearance of the oxidisers within the MeOH synthesis for the calcium nitrate and strontium nitrate products. (Figures S29 and S30).

Ca4\_2 observed vs. calc.

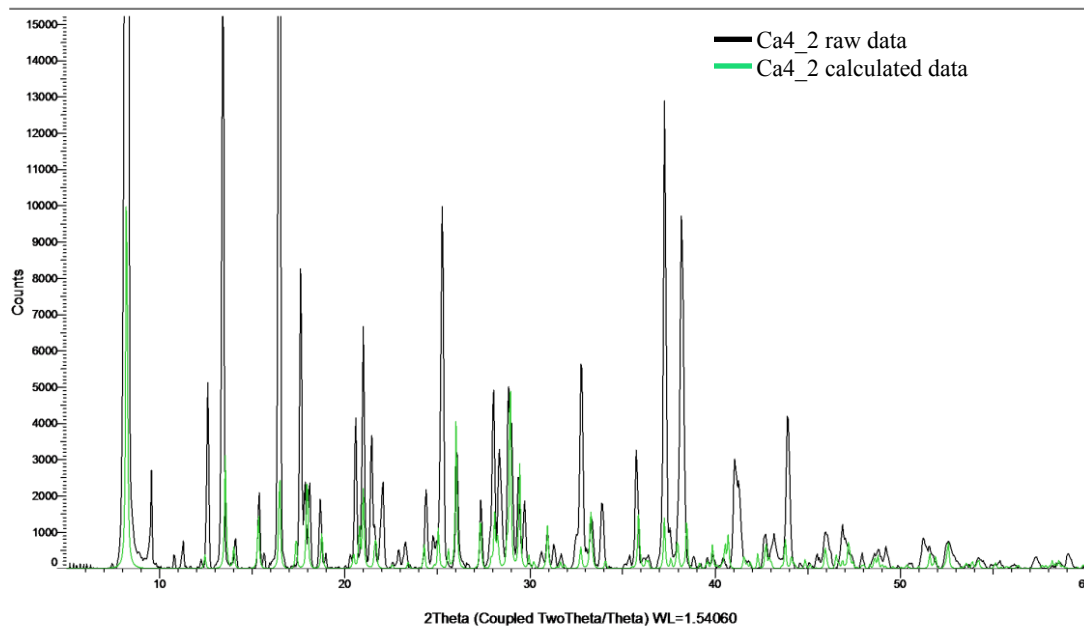

Figure S29 - Ca4\_2 observed vs calculated

Sr4\_2 observed vs. calc.

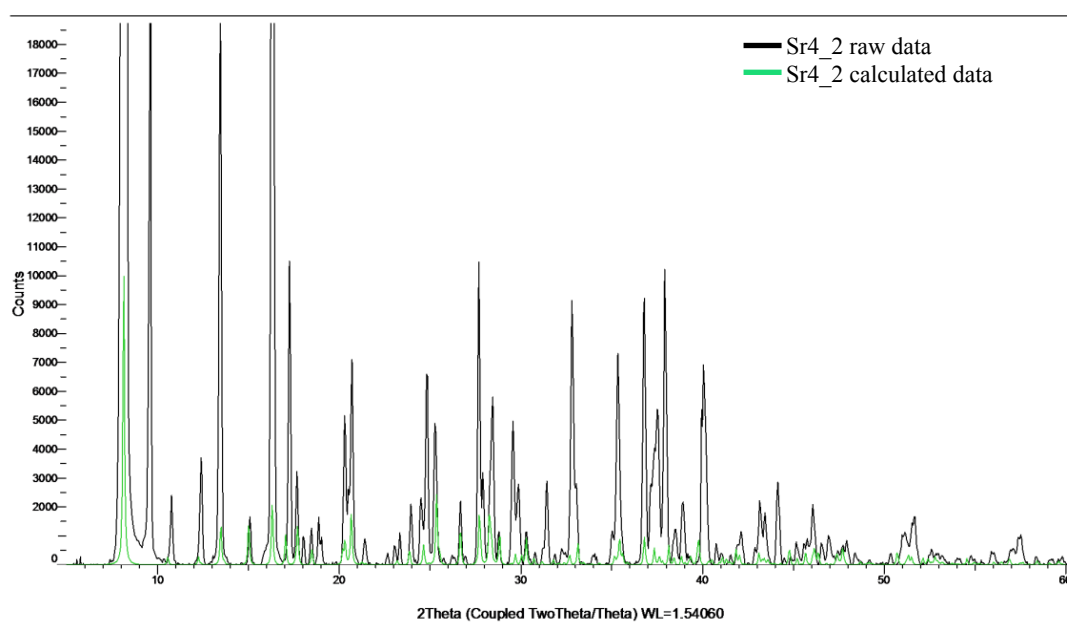

Figure S30 - Sr4\_2 observed vs calculated

Calcium nitrate and strontium nitrate products PXRD patterns were overlaid to further emphasise the observations made from overlaying the structures in Mercury (Figure S33) where these structures were seen to be isostructural. This is evident from the PXRD patterns (Figure S31 and S32).

Ca4\_2 vs. Sr4\_2 raw data comparison

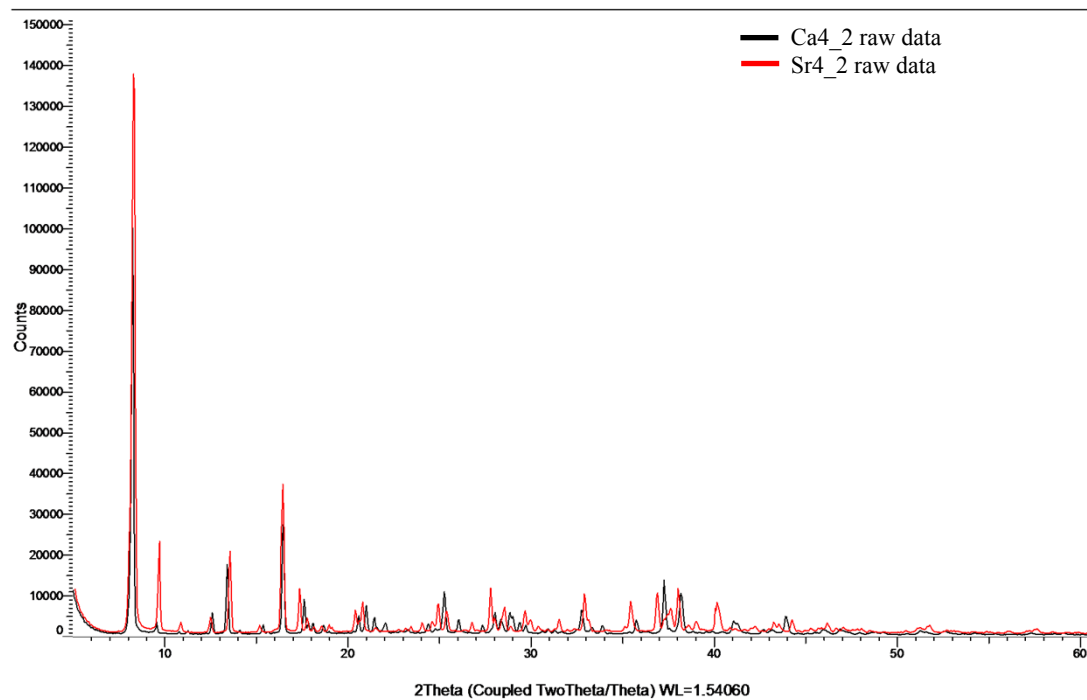

Figure S31 - Ca4\_2 vs Sr4\_2 observed

Ca4\_2 vs. Sr4\_2 calculated data comparison

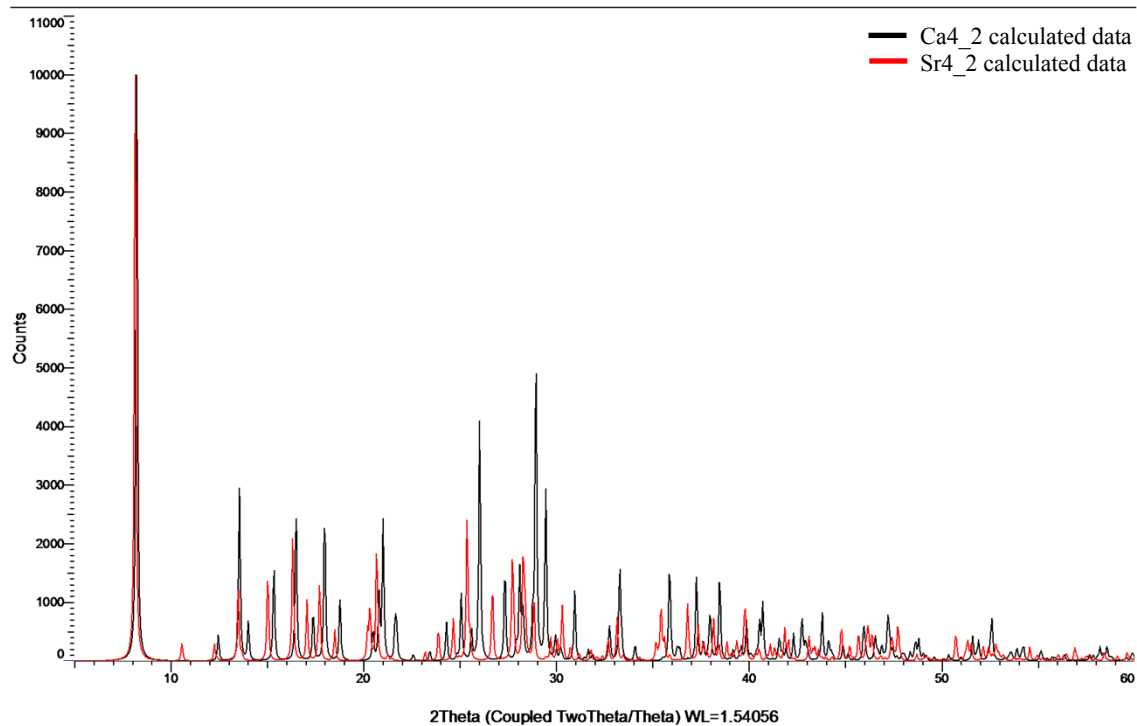

Figure S32 - Ca4\_2 vs Sr4\_2 calculated



Sr5\_2 observed vs. calc.

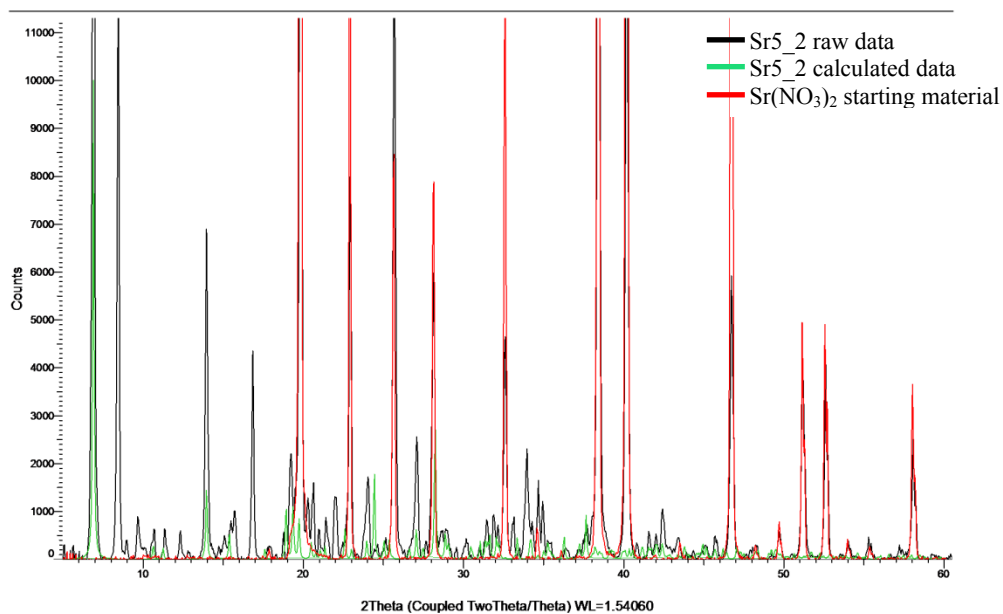

Figure S35- Sr5\_2 Product and Starting Material Overlay

The bulk material for Sr5\_2 comprises of new product and oxidiser starting material. It additionally contains another unidentified microcrystalline component.

Ca6\_2 observed vs. calc.

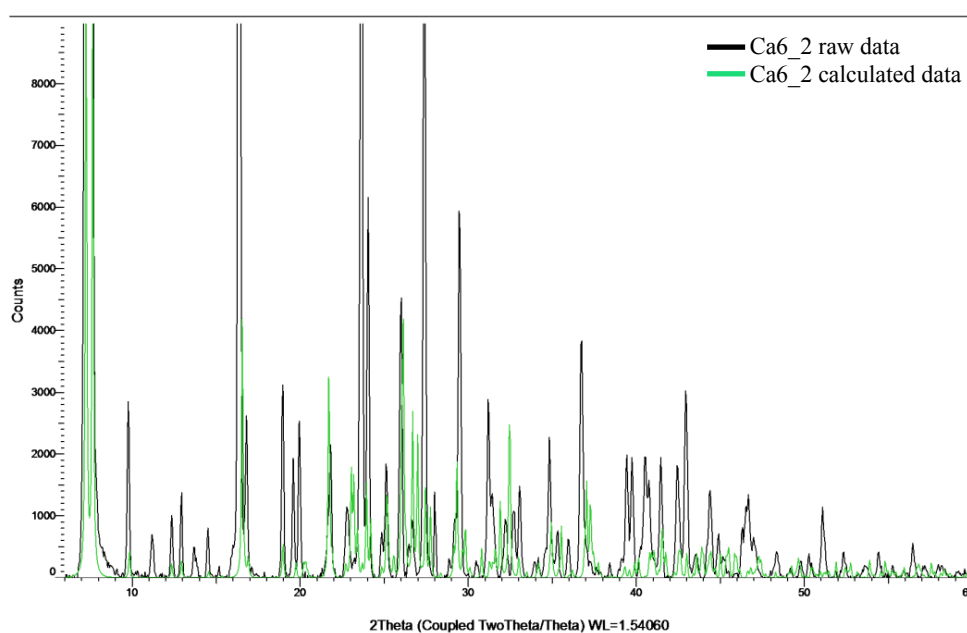

Figure S36 - Ca6\_2 Product Overlay

This PXRD pattern suggests that the resultant product is pure.

Sr6\_1 observed vs. calc.

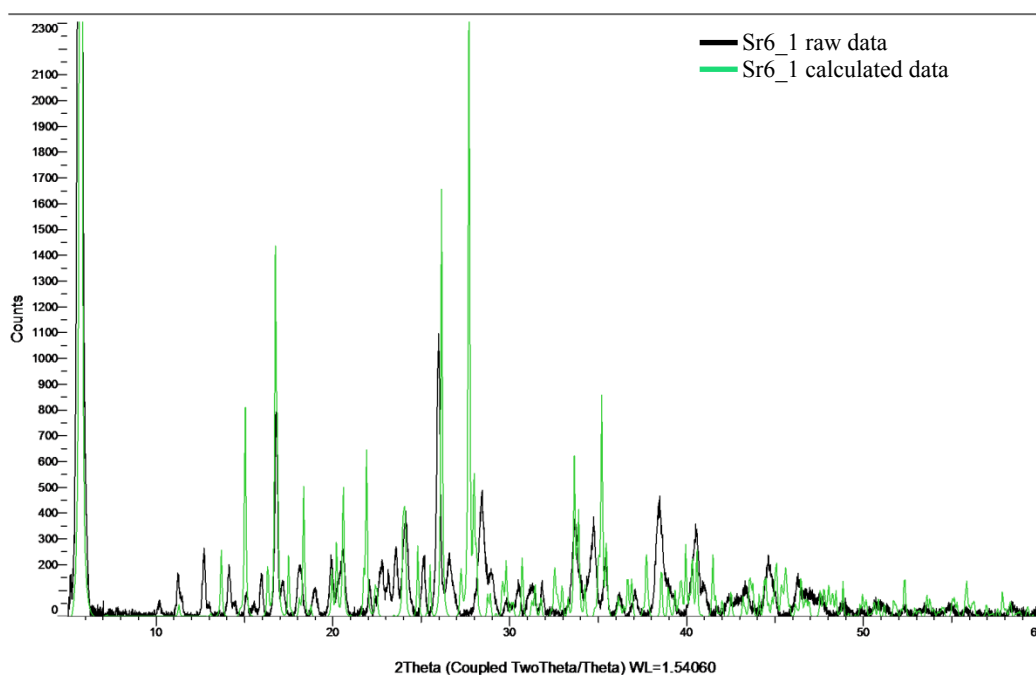

Figure S37 - Sr6\_1 Product Overlay

This PXRD pattern also suggests a high level of purity.

Sr6\_2 observed vs. calc.

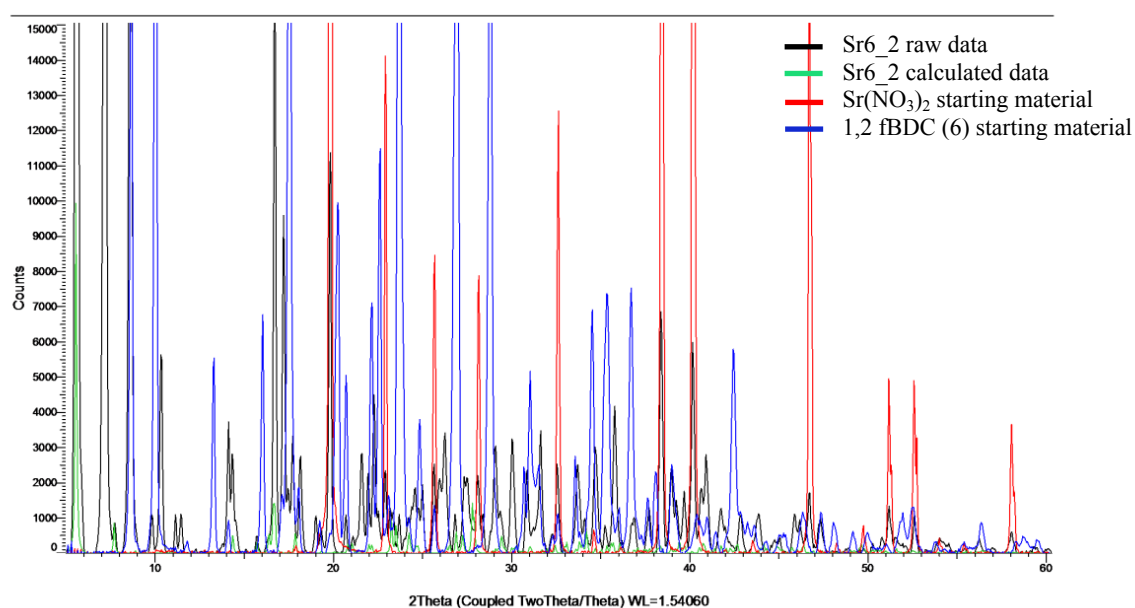

Figure S38 - Sr6\_2 Product and Starting Material Overlay

Sr6\_2 PXRD pattern is both a mixture of starting materials and new products. Only one of these new products could be identified by SXRD.



Ba6\_2 observed vs. calc.

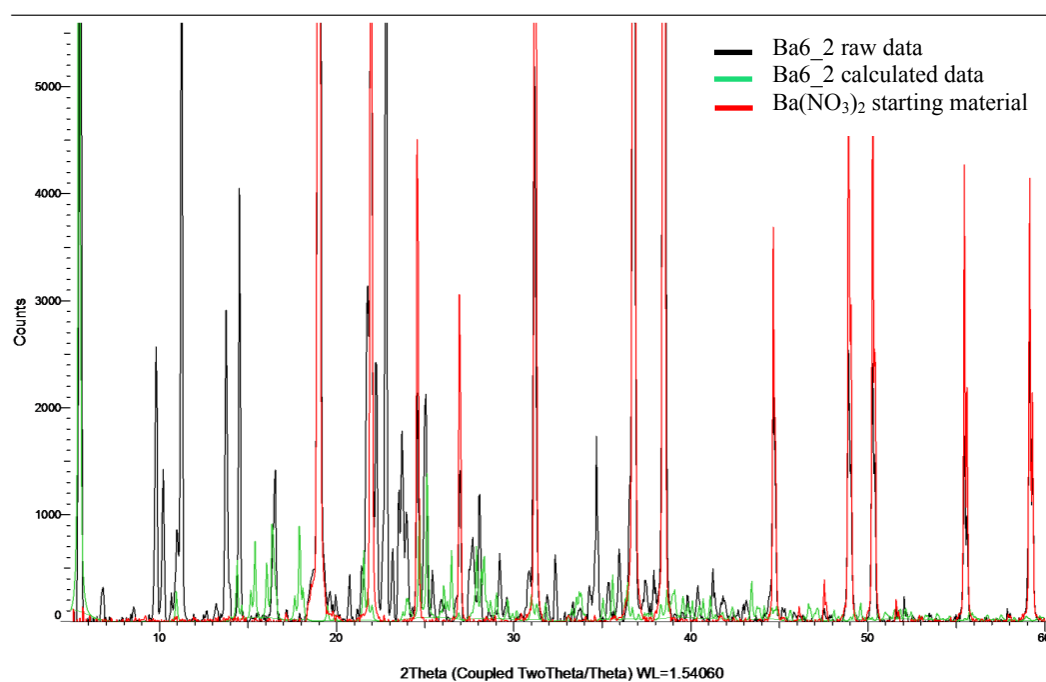

Figure S39 - Ba6\_2 Product and Starting Material Overlay

Ba6\_2 comprises of new product and oxidiser starting material.

The other crystal structures which formed in combination with the fluorinated linkers could not be characterised by SXRD but their PXRD patterns suggest new products have resulted.

Ca4\_1 observed vs. calc.

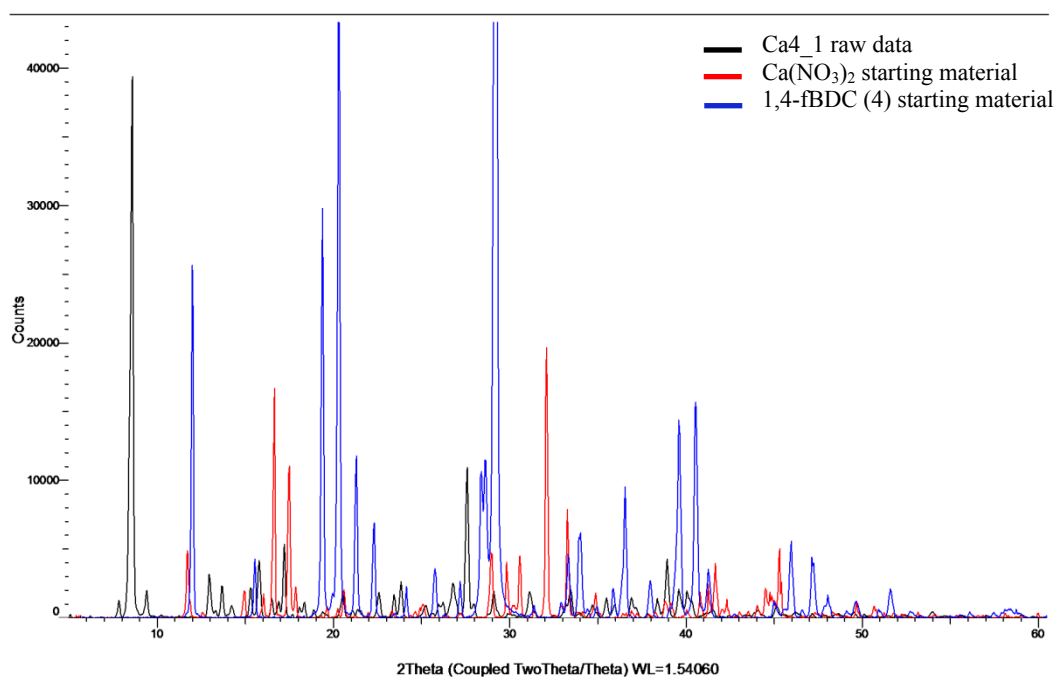

Figure S40 - Ca4\_1 Starting Material Overlay

Sr4\_1 observed vs. calc.

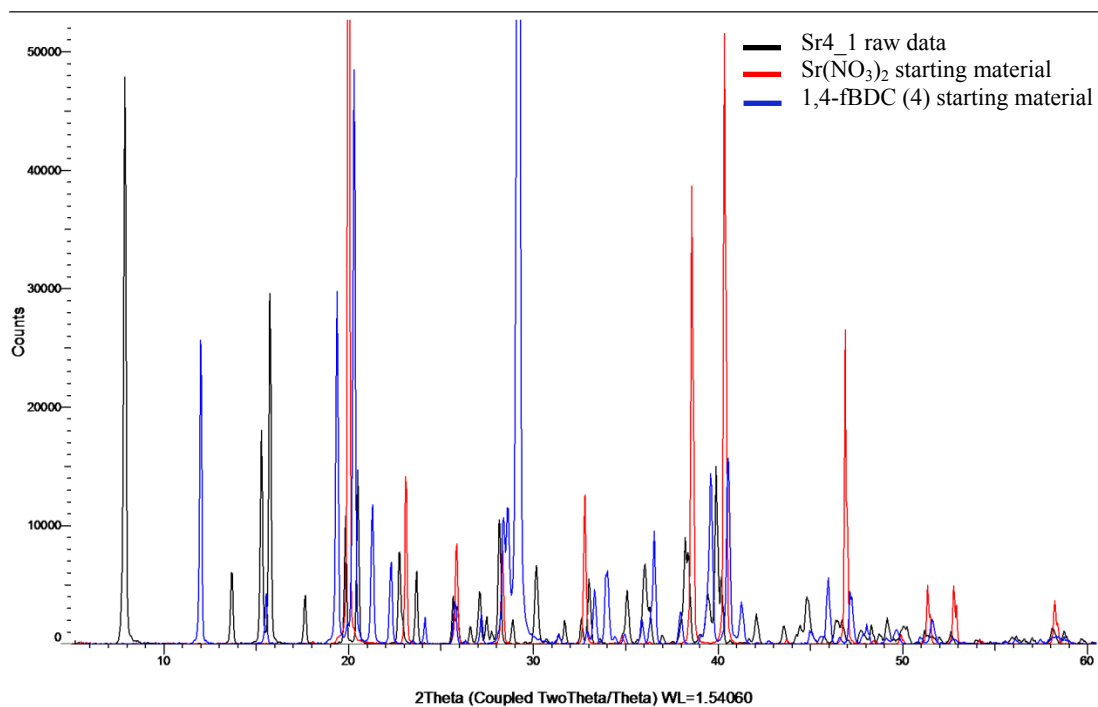

Figure S41 - Sr4\_1 Starting Material Overlay

Ca5\_1 observed vs. calc.

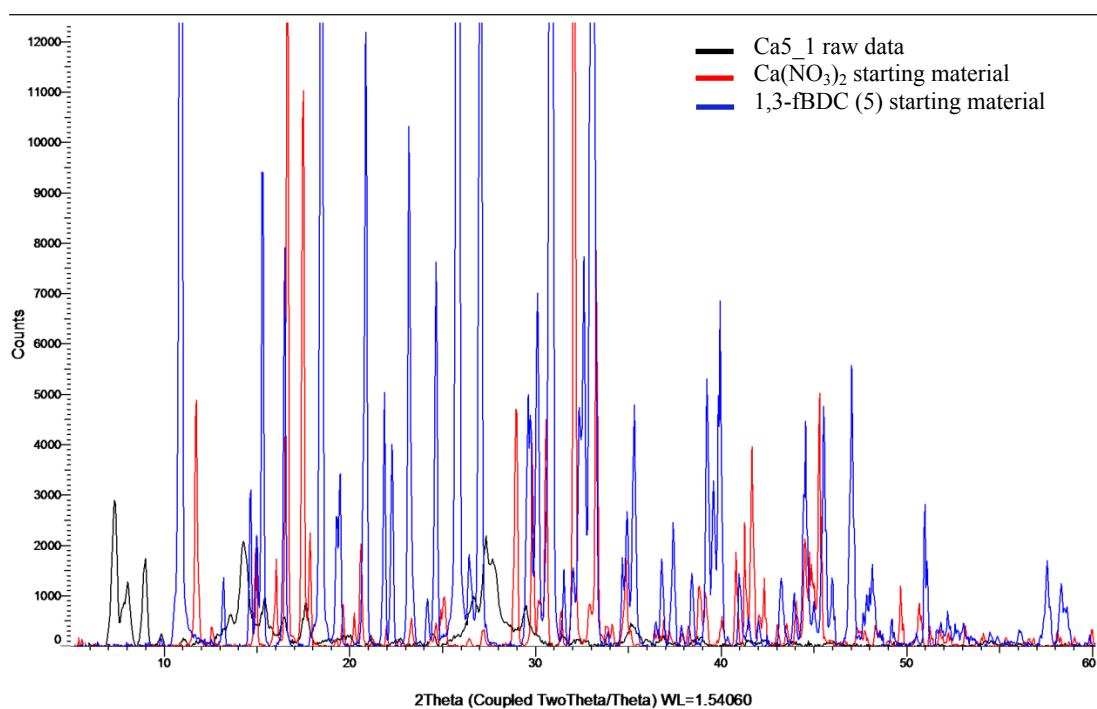

Figure S42 - Ca5\_1 Starting Material Overlay

Ca5\_2 observed vs. calc.

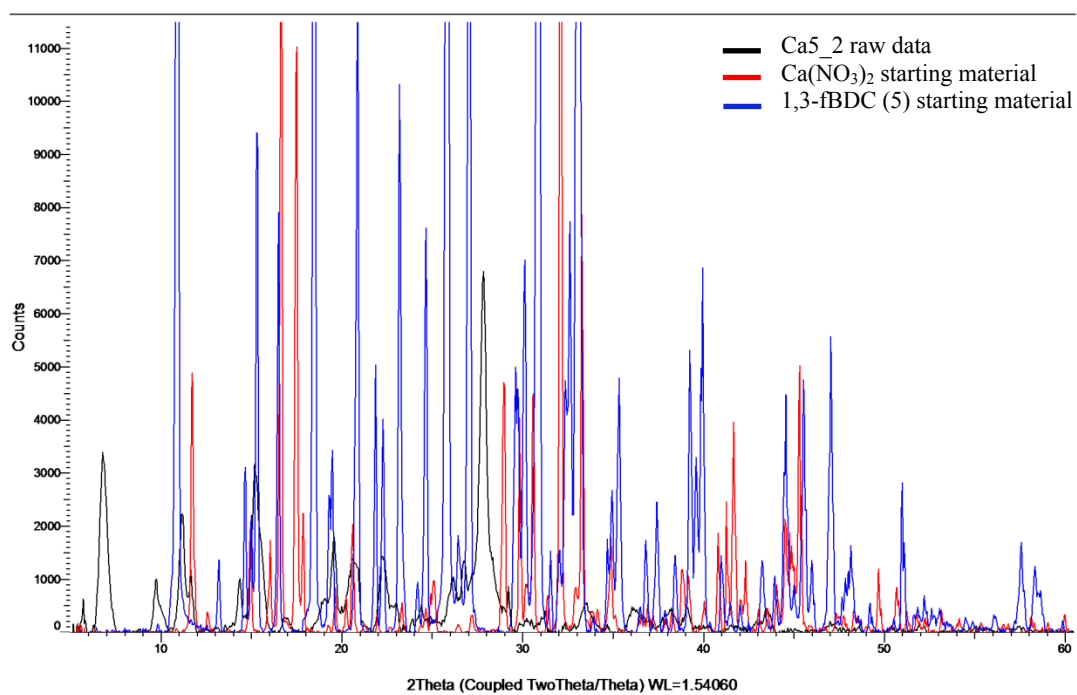

Figure S43 - Ca5\_2 Starting Material Overlay

Ba5\_1 observed vs. calc.

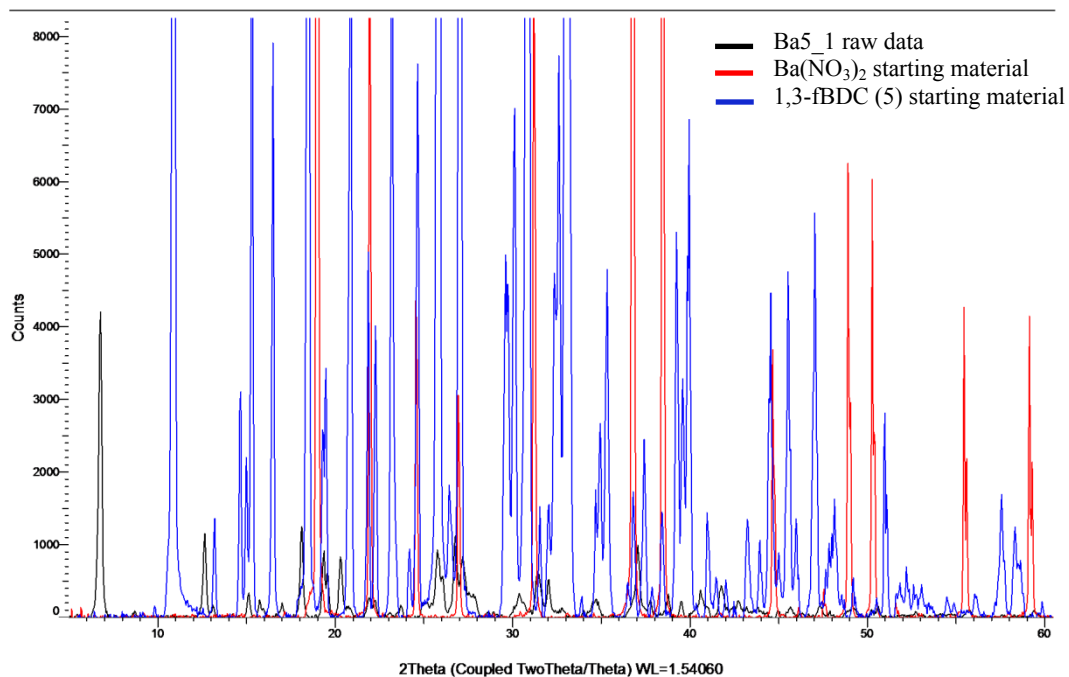

Figure S44 - Ba5\_1 Starting Material Overlay

Ba5\_2 observed vs. calc.

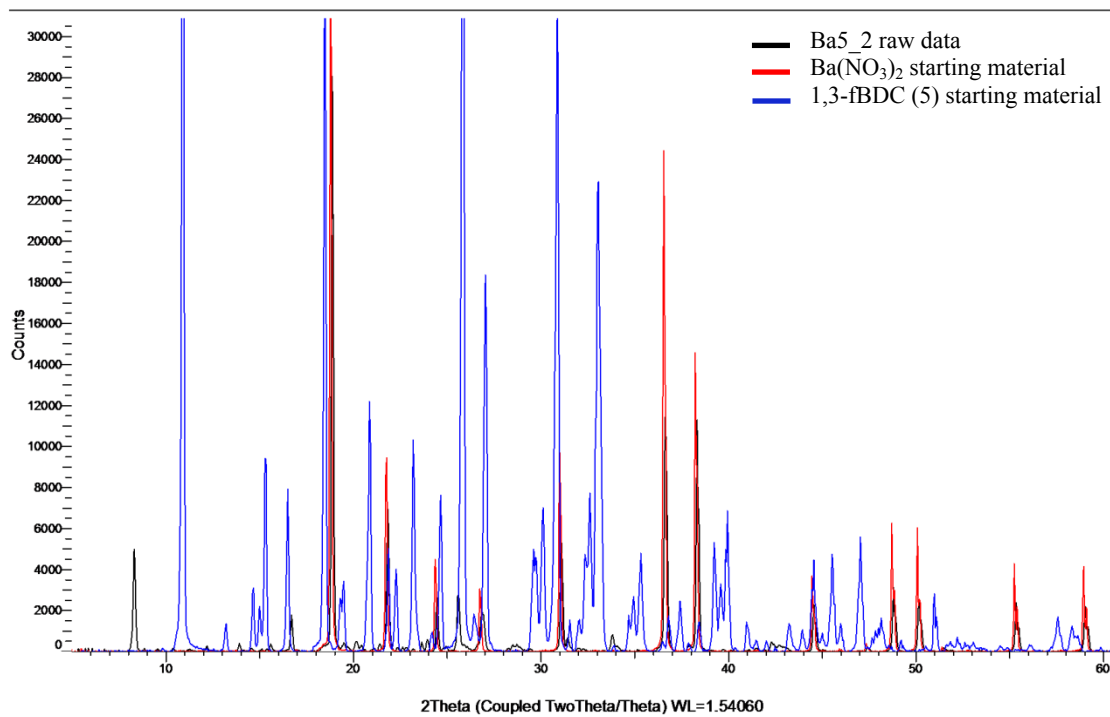

Figure S45 - Ba5\_2 Starting Material Overlay

Ca6\_1 observed vs. calc.

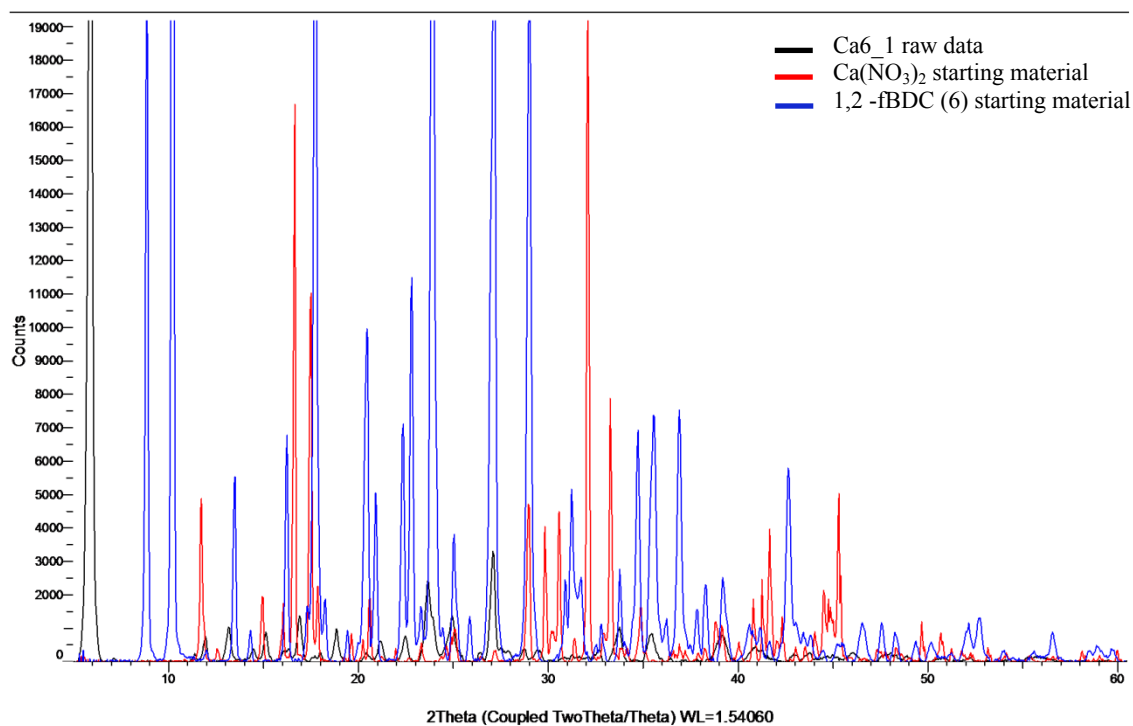

Figure S46 - Ca6\_1 Starting Material Overlay

Ba6\_1 observed vs. calc.

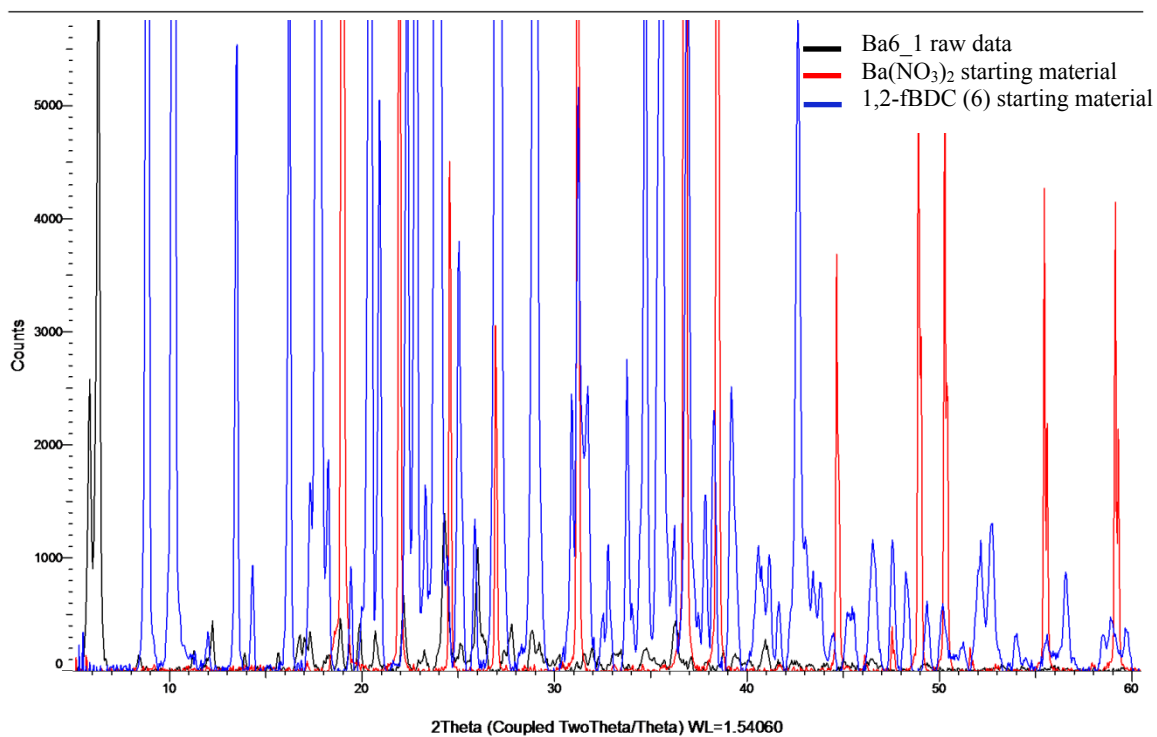

Figure S47 - Ba6\_1 Starting Material Overlay

#### 4.4 DSC Traces (under nitrogen)

The thermal analysis of each MOF described below was carried out using a Mettler-Toledo differential scanning calorimeter instrument, model DSC821e, equipped with a liquid nitrogen low temperature attachment and a TSO801RO Universal sample robot (heating rate:  $10^{\circ}\text{Cmin}^{-1}$ ; the flow rate of nitrogen gas: 40ml/min; the sample size: 4 – 10mg in 40 $\mu\text{l}$  aluminium dishes).

The DSC traces below compares the thermal effects of incorporating different metals, Ca(black), Sr(red), and Ba(blue), along with either BDC or fBDC in a MOF using solution method 1 (DMF).

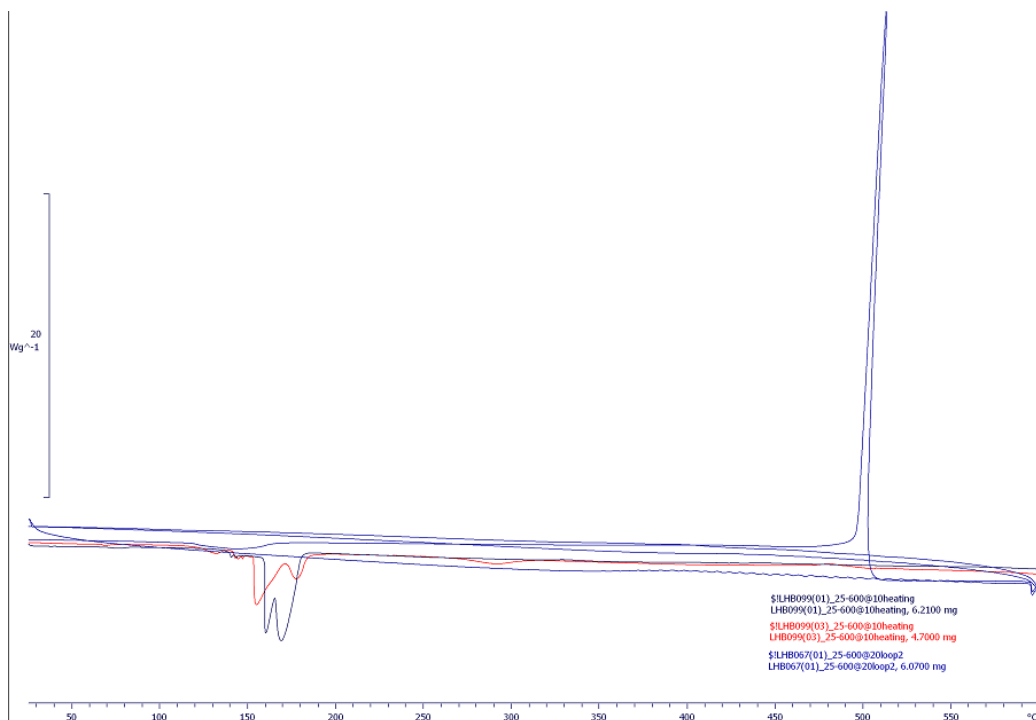

Figure S48 – 1,4-BDC vs Metal DSC Trace

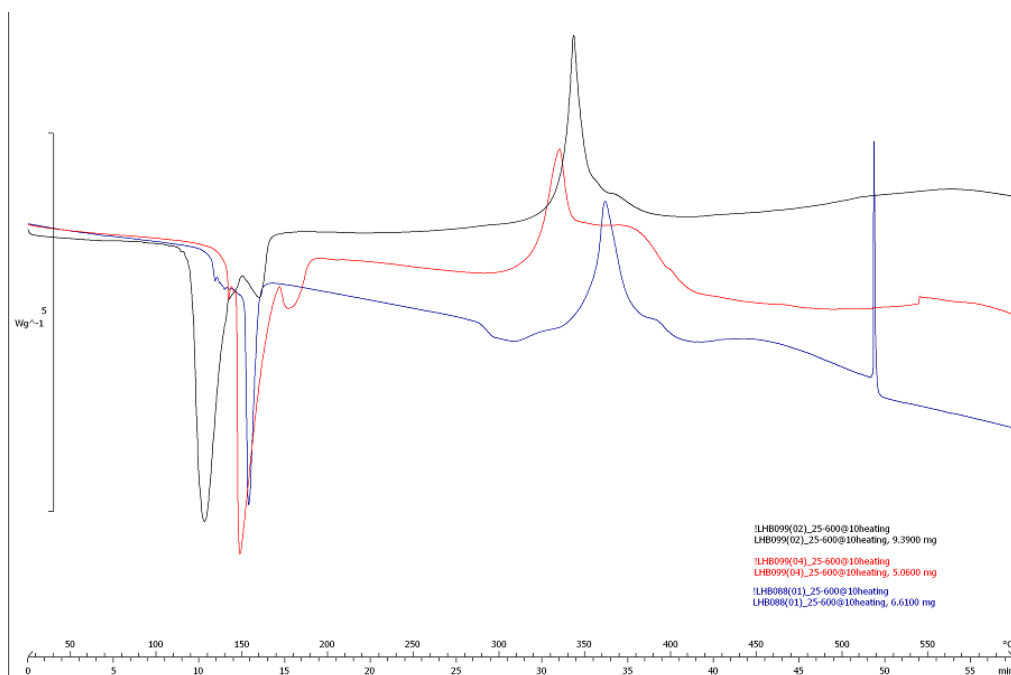

Figure S49 – 1,4-fBDC vs Metal DSC Trace

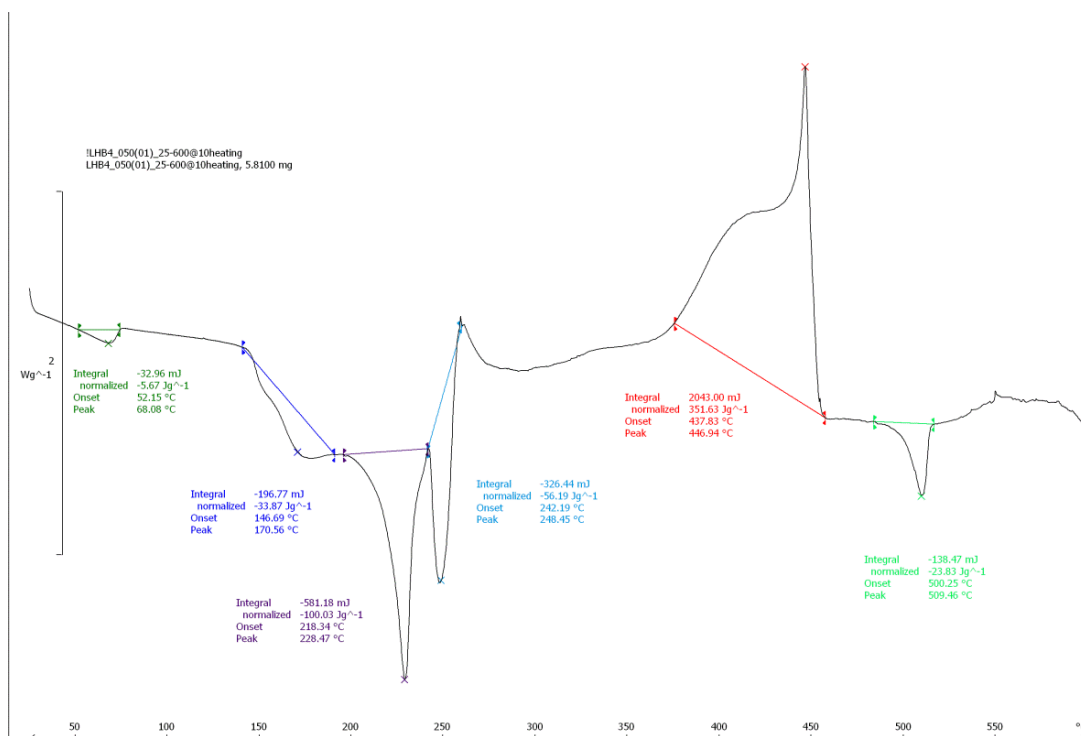

Figure S50 – Ca4\_2 DSC Trace

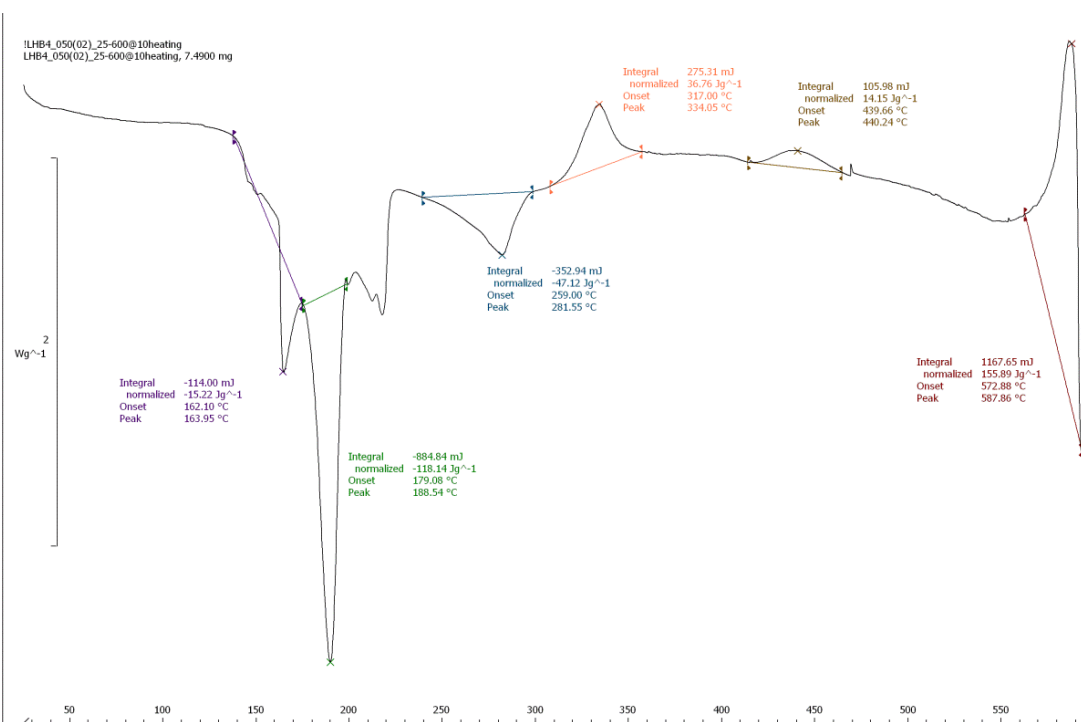

Figure S51 – Sr4\_2 DSC Trace

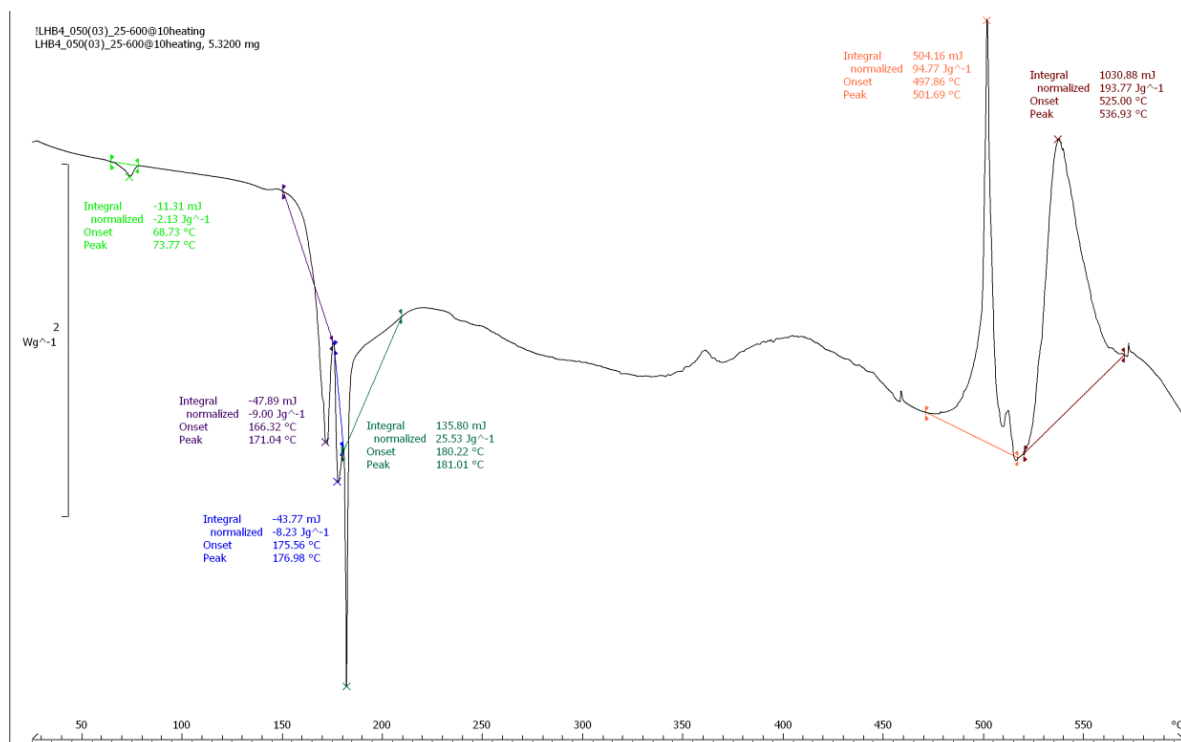

Figure S52 – Ba4\_2 DSC Trace

A number of Ba containing products show a peak positioned at the same point (~500°C). A decomposition product expected to result from heating these materials to high temperatures is barium oxide. This reacts at 500–600 °C with air to form barium peroxide, which decomposes at above 700 °C by releasing oxygen.<sup>[10]</sup>

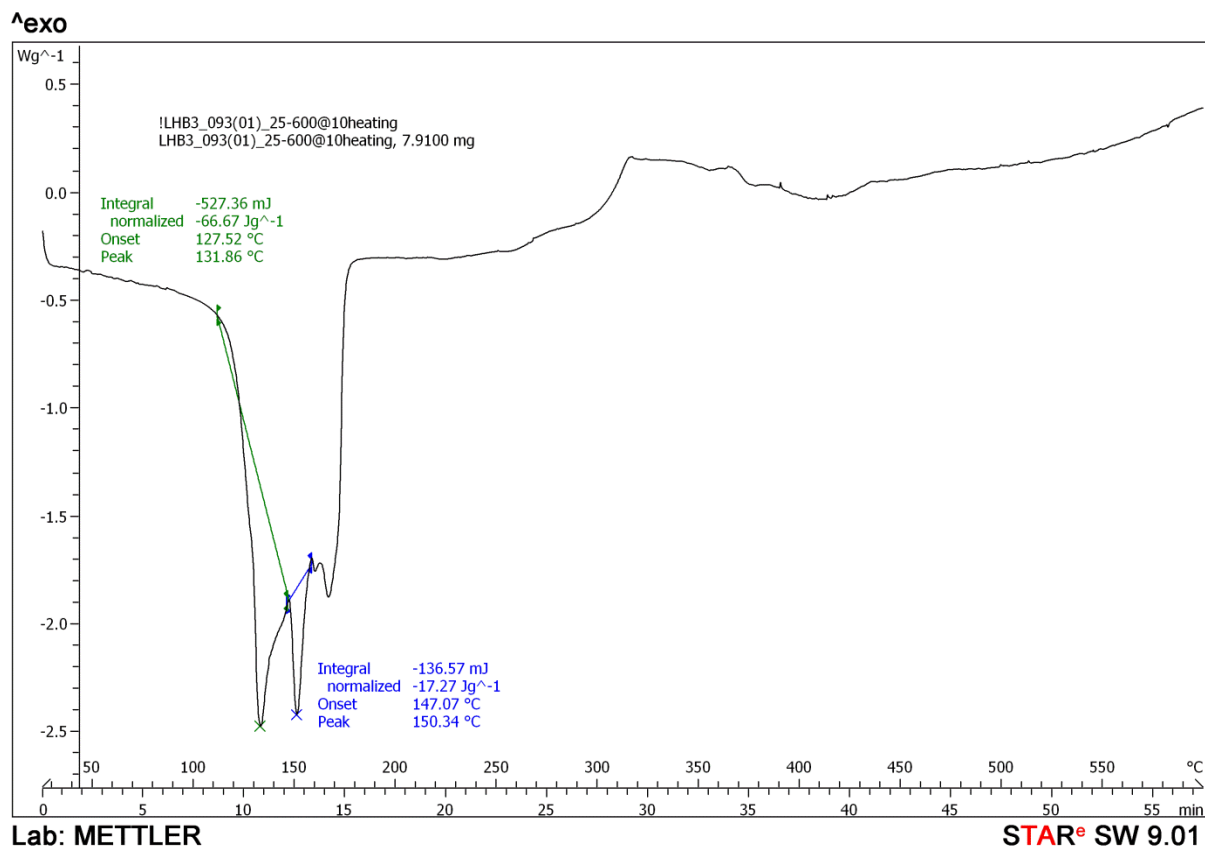

Figure S53 – Ca5\_1 DSC Trace



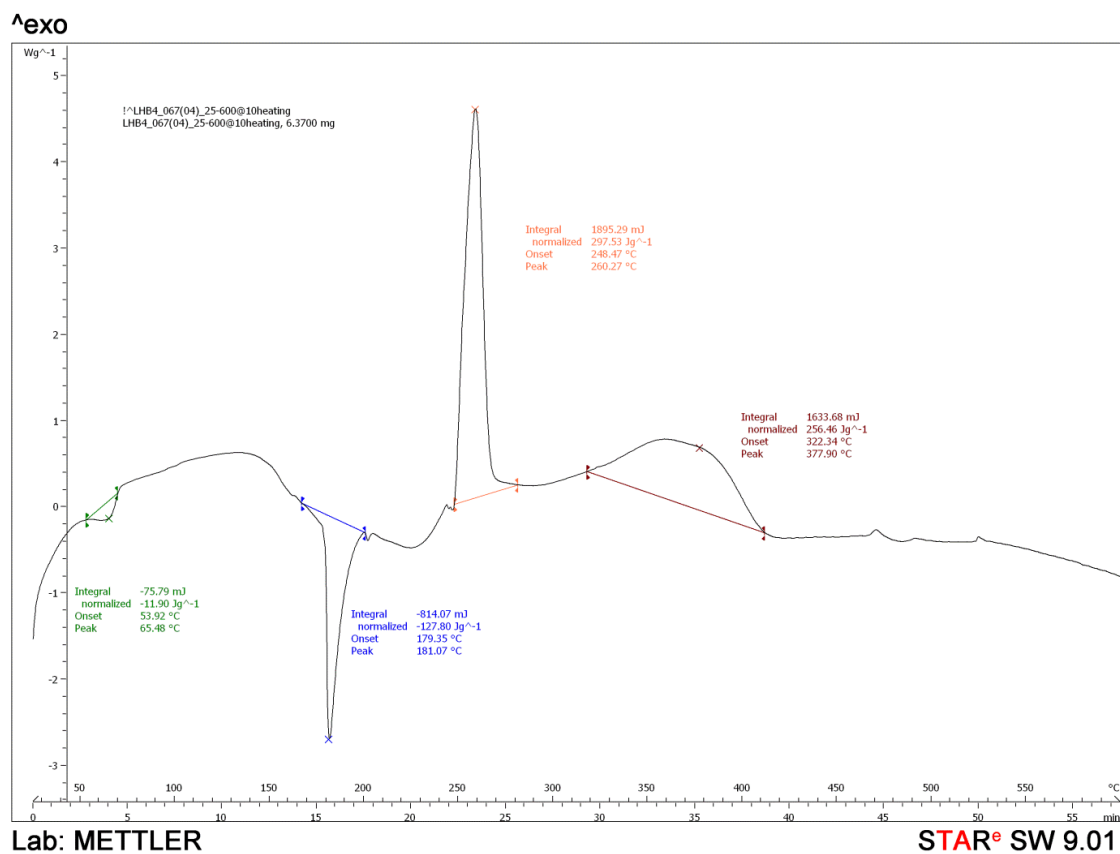

Figure S54 – Ca5\_2 DSC Trace

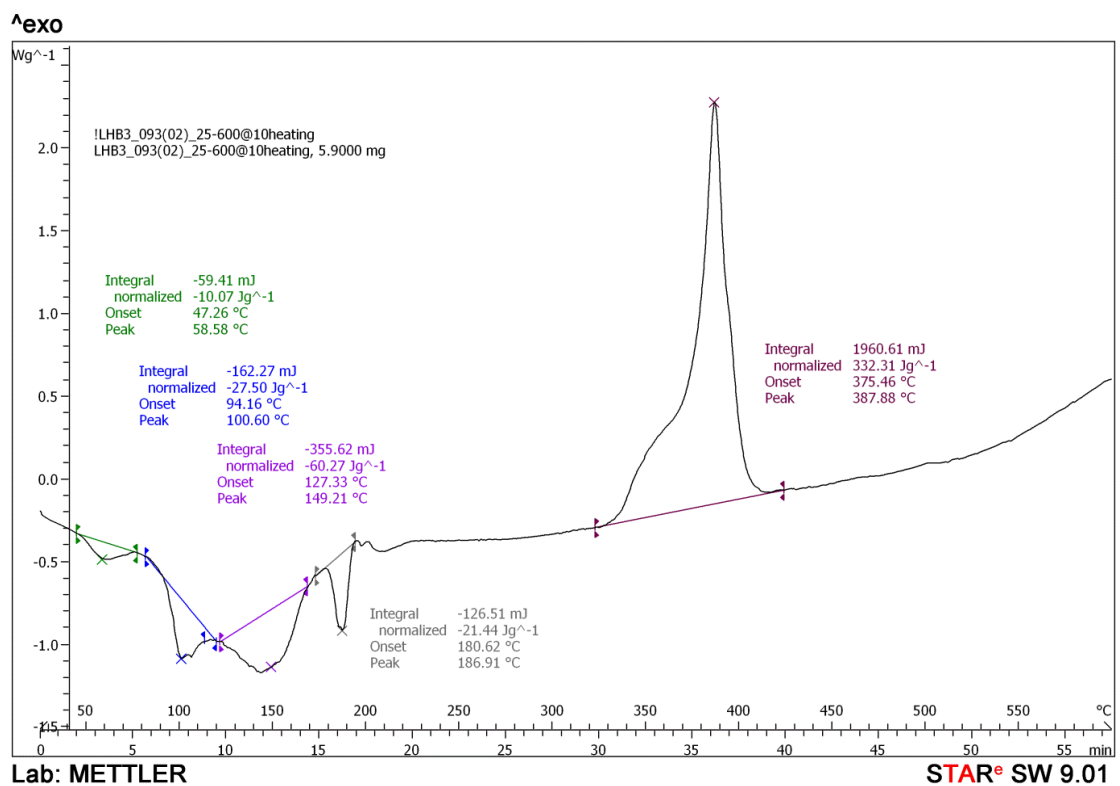

Figure S55 – Sr5\_1 DSC Trace

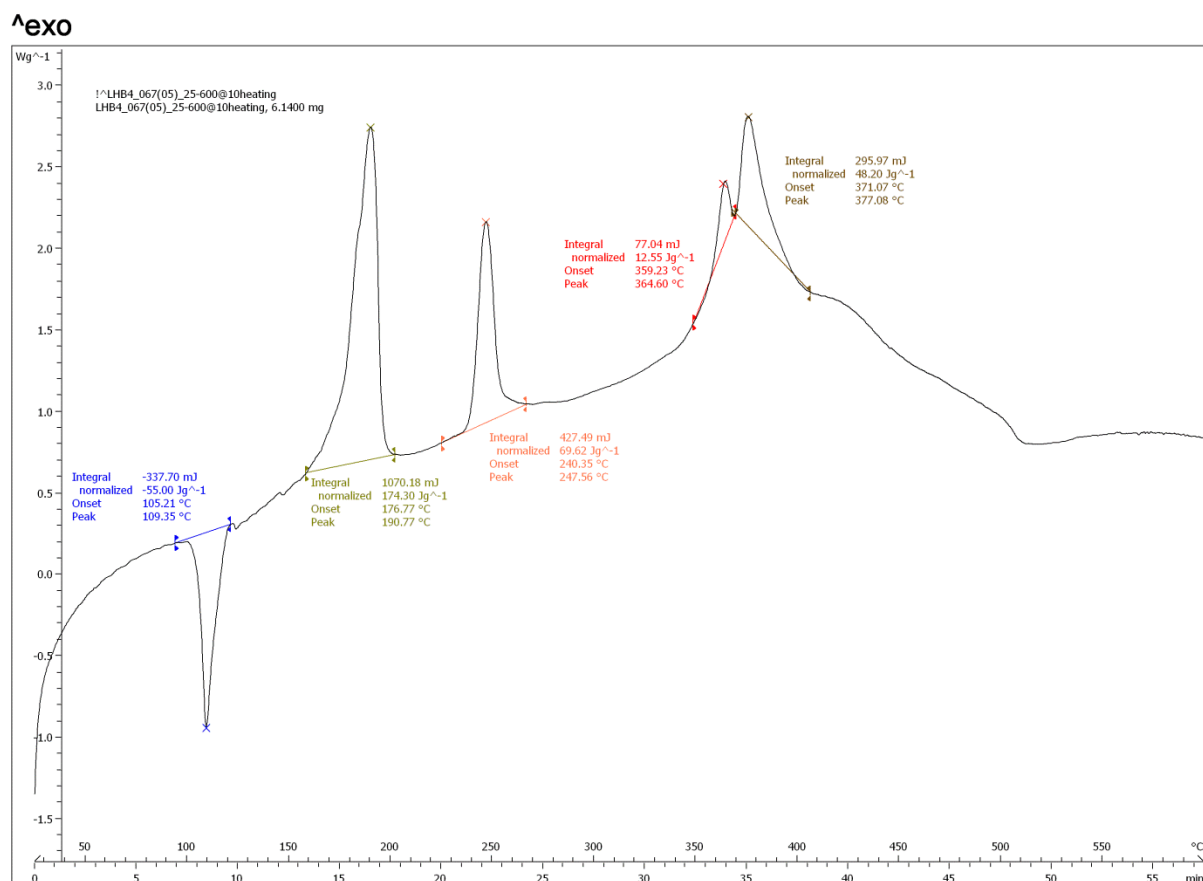

Figure S56 – Sr5\_2 DSC Trace

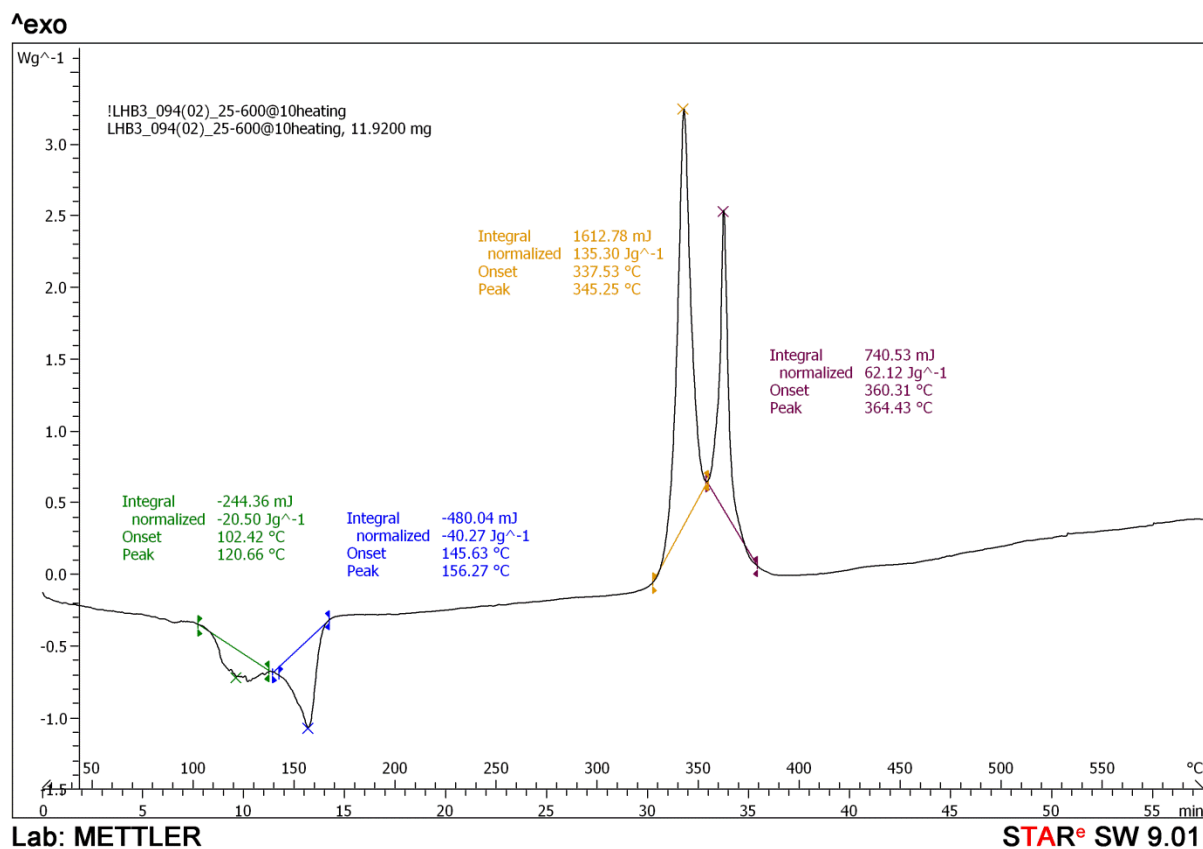

Figure S57 – Ba5\_1 DSC Trace

<sup>exo</sup>

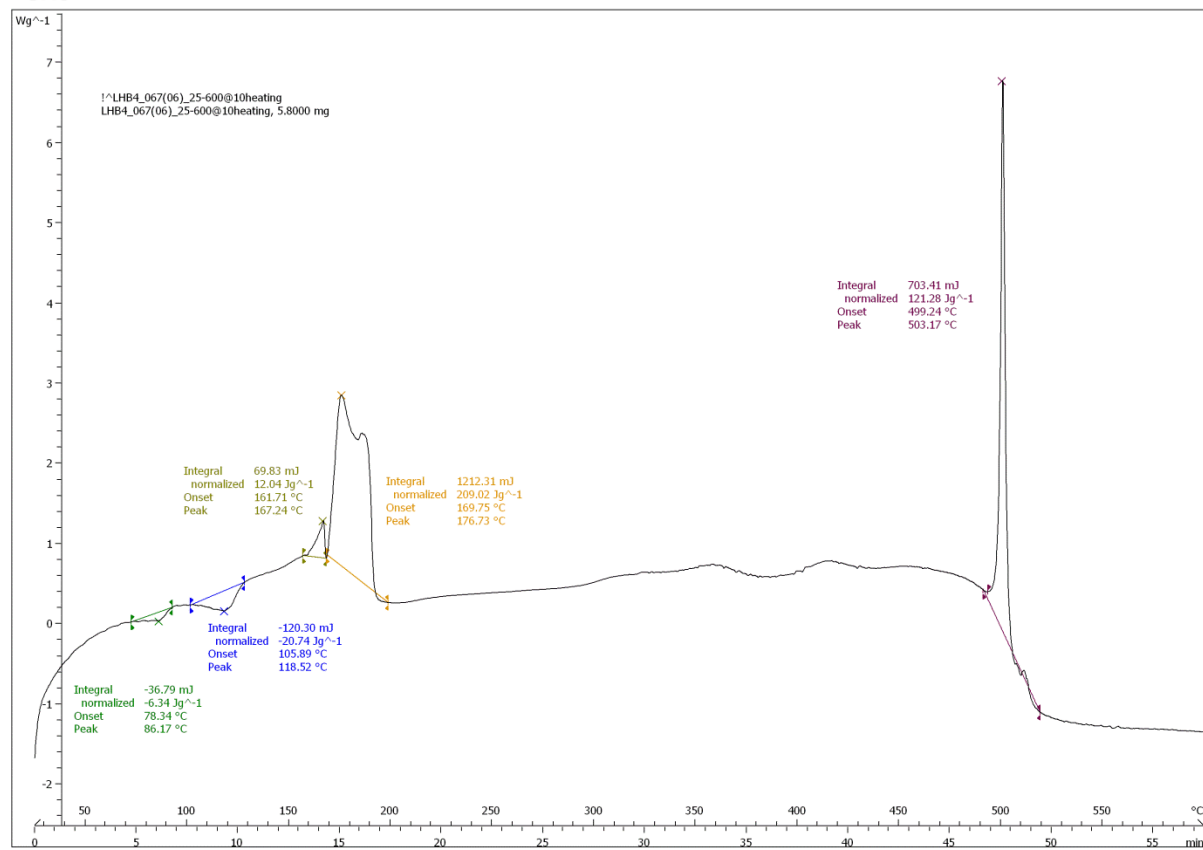

Lab: METTLER

STAR<sup>e</sup> SW 9.01

Figure S58 –Ba5\_2 DSC Trace

<sup>exo</sup>

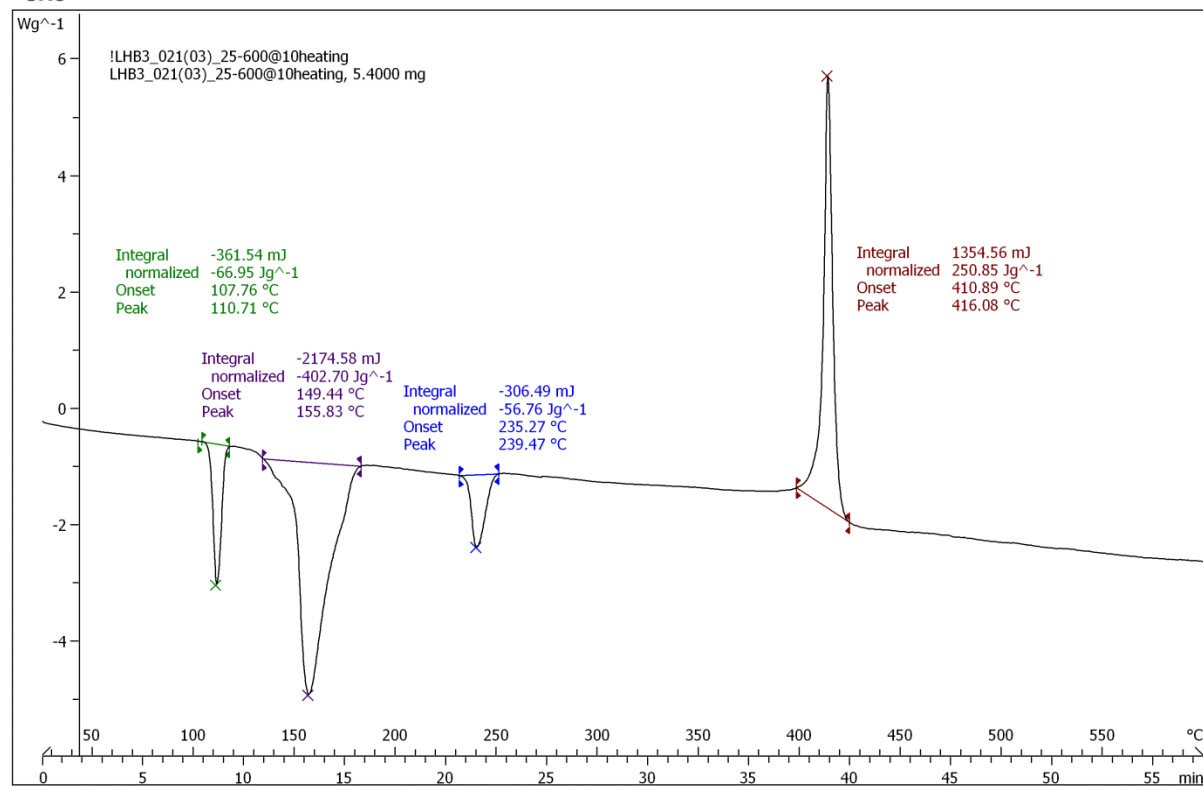

Lab: METTLER

STAR<sup>e</sup> SW 9.01

Figure S59 – Ca6\_1 DSC Trace

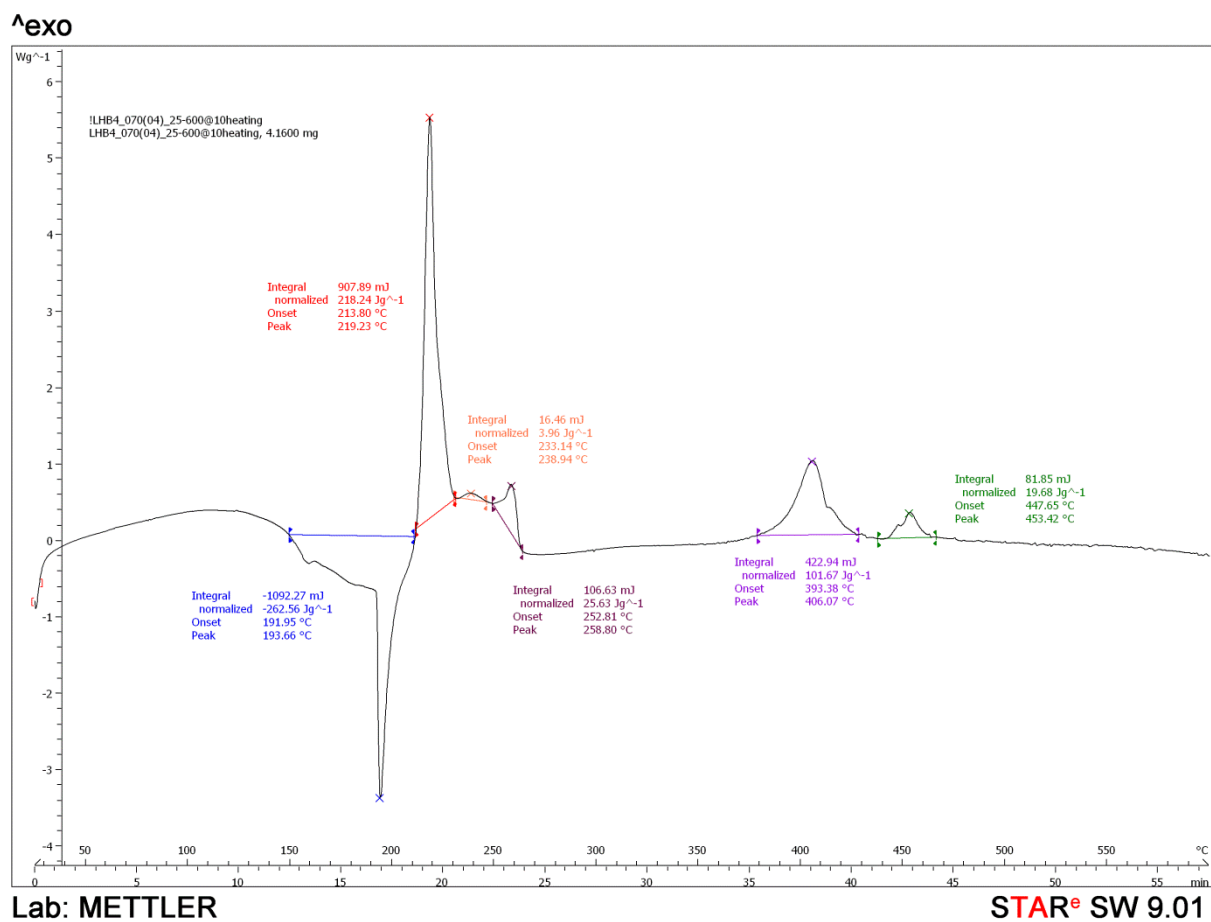

Figure S60 – Ca6\_2 DSC Trace

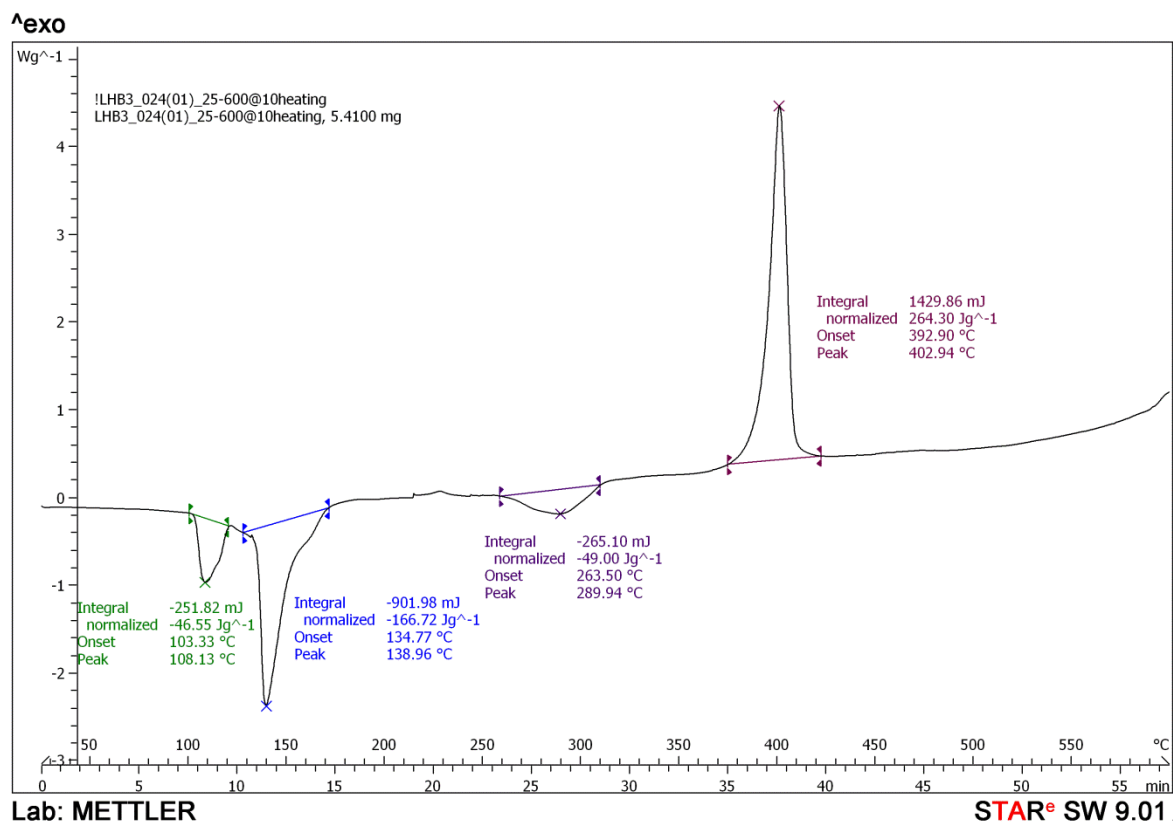

Figure S61 – Sr6\_1 DSC Trace

<sup>exo</sup>

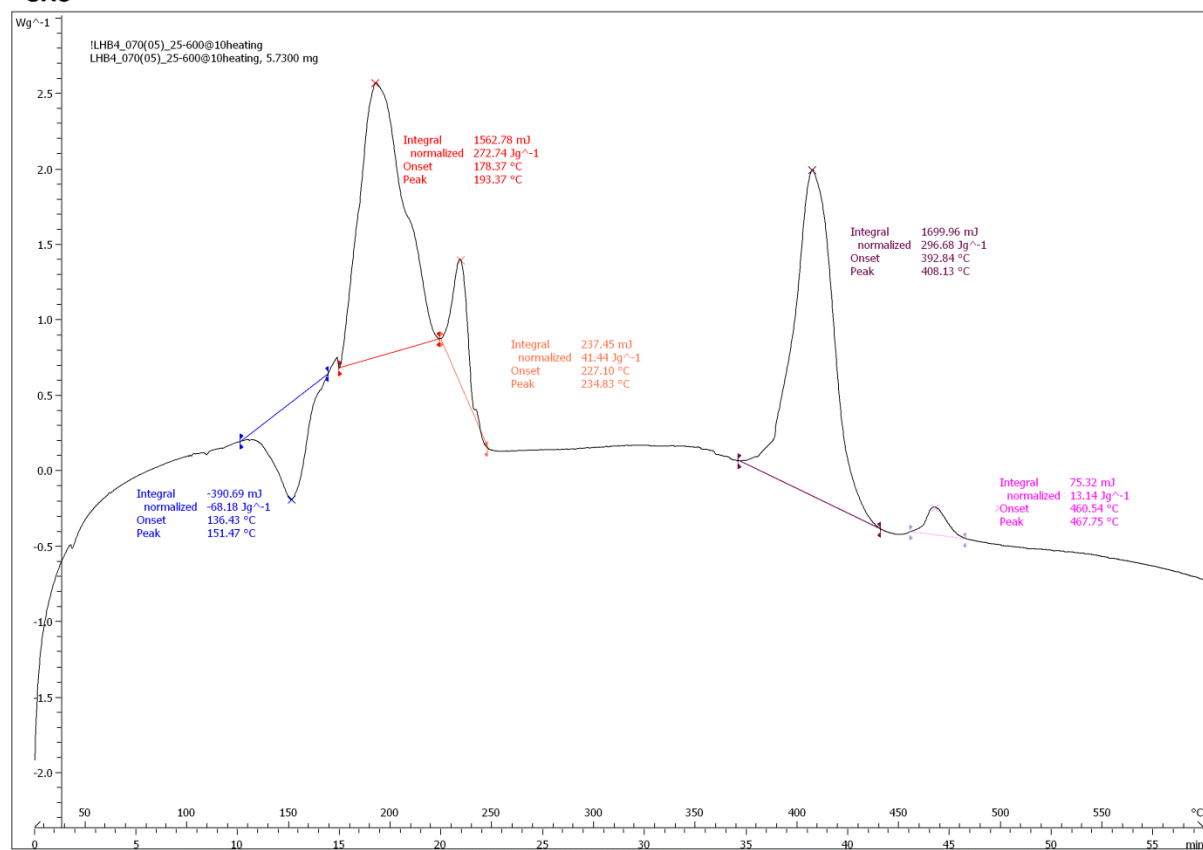

Lab: METTLER

STAR<sup>e</sup> SW 9.01

Figure S62 – Sr6\_2 DSC Trace

<sup>exo</sup>

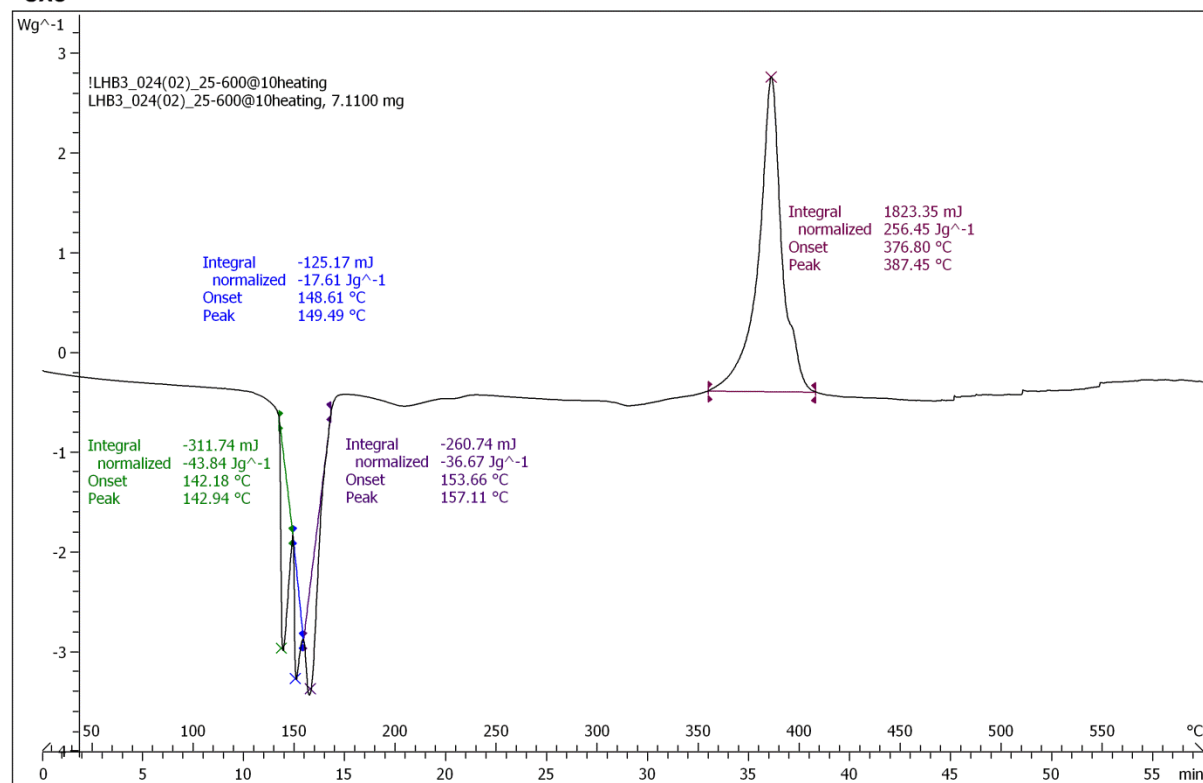

Lab: METTLER

STAR<sup>e</sup> SW 9.01

Figure S63 – Ba6\_1 DSC Trace

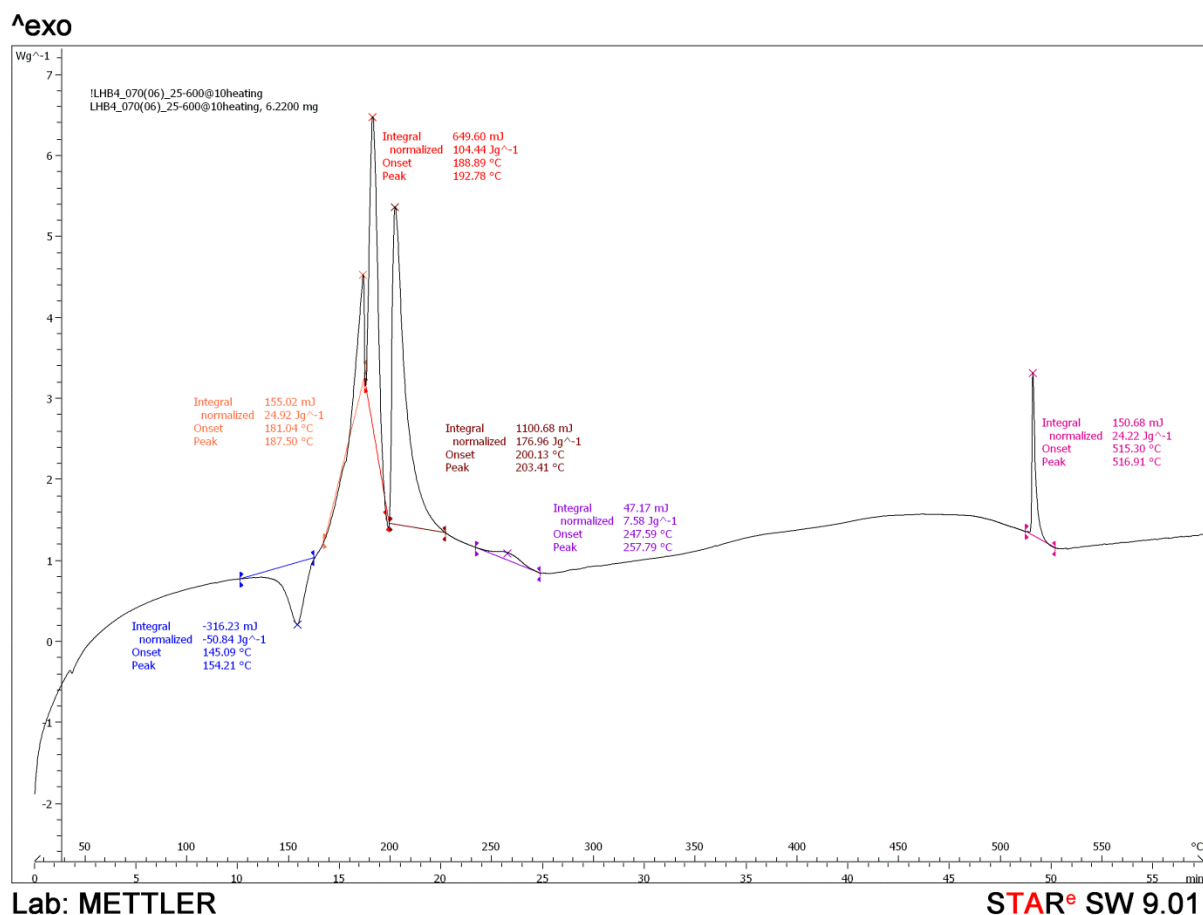

Figure S64 – Ba6\_2 DSC Trace

Several of the fluorinated products showed similar thermal decomposition patterns with only Ca5\_1 being unique showing no exothermic peaks. Similarities are seen between Sr5\_1 and Ba5\_1. They show endothermic peaks at around 150°C and then an exothermic peak(s) occurring nearer 350°C. Ca6\_1, Sr6\_1 also produce a similar pattern; a collection of three or so endothermic peaks followed by a larger exothermic peak. Ba6\_1 resembles these patterns also but only loosely. Car5\_2, Sr5\_2 and Ca6\_2 reveal a rapid transition into an exothermic event occurs immediately after an initial endothermic reaction. Sr6\_2 and Ba6\_2 both produce two exothermic events although the second peak appears much later for the Ba product. These patterns appear to arise as a consequence of the synthetic method used as the similarities only seem to appear when comparing across a series of products resulting from a single approach.

## 4.5 Burn Tests

The alkaline earth metal MOFs were burn tested within a fume hood on top of a heat proof mat which had a small enclosure mounted on top of it to minimise the effects of the airflow on the burn test. Approximately 15mg of sample was placed into an aluminium DSC lid. The lid was then transferred onto a heat proof tile and ignited using a blow torch. Photographs were taken by Sharif Ahmed using a Canon EOS 7D camera (exposure 1/100 sec).

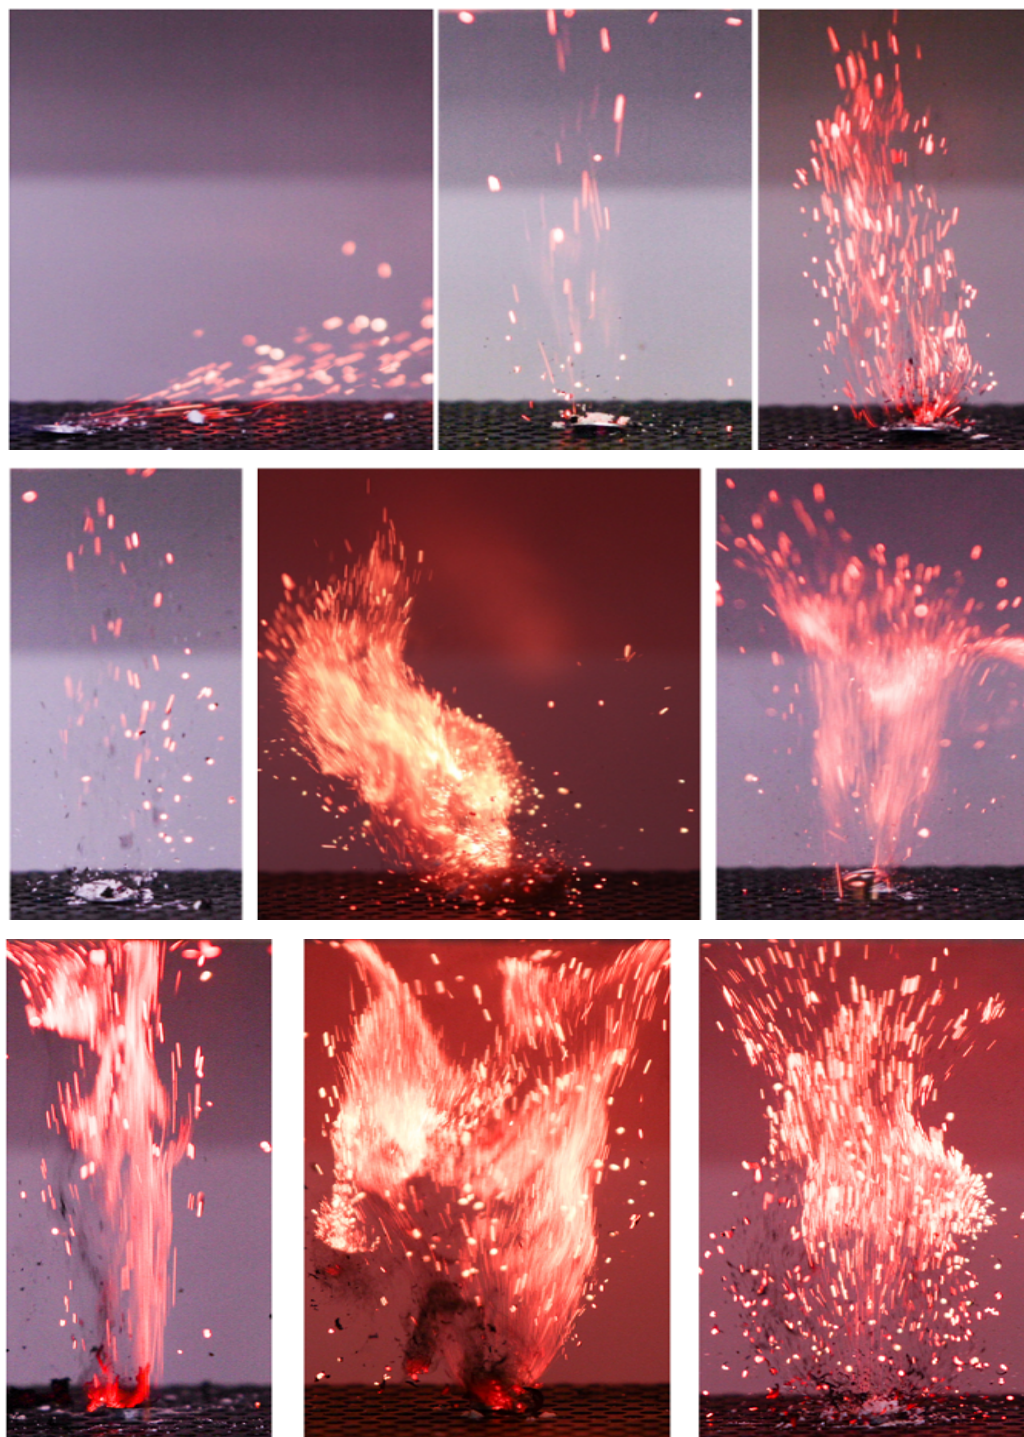

Figure S65 - 1<sup>st</sup> Route synthesis : (1<sup>st</sup> row Ca, Sr, Ba 1,4 fBDC, 2<sup>nd</sup> row Ca, Sr, Ba 1.3-fBDC, 3<sup>rd</sup> row Ca, Sr, Ba 1,2-fBDC)



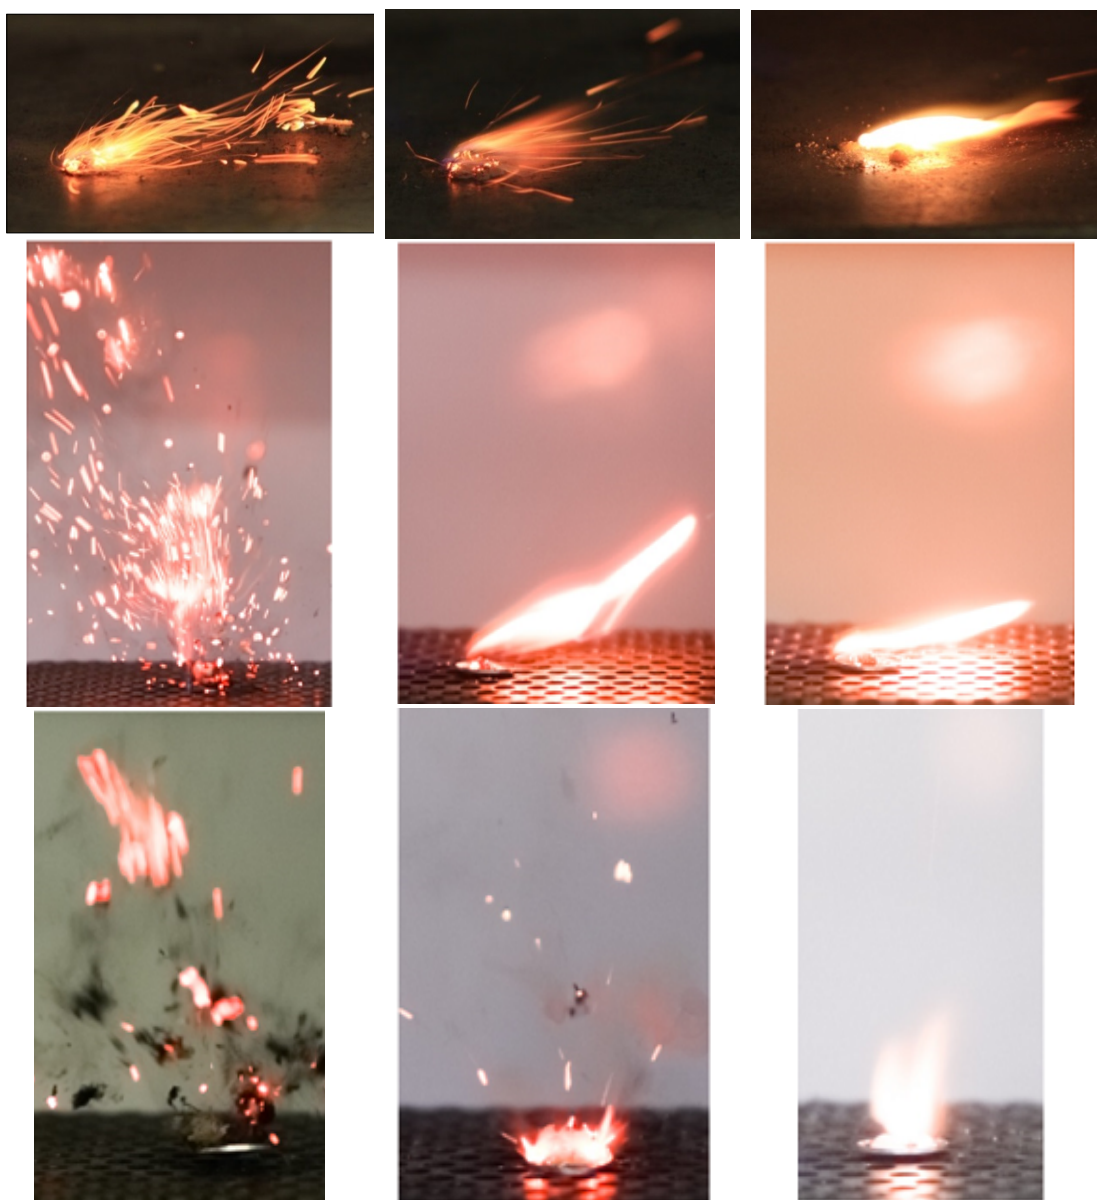

Figure S66 - 2<sup>nd</sup> Route synthesis : (1<sup>st</sup> row Ca, Sr, Ba 1,4 fBDC, 2<sup>nd</sup> row Ca, Sr, Ba 1,3-fBDC, 3<sup>rd</sup> row Ca, Sr, Ba 1,2-fBDC)



## **References:**

- [1] D. Saha, S. Deng, Z. Yang, *J. Porous Mater.* **2009**, *16*, 141-149.
- [2] W. Clegg, L. Russo, *Crystal Growth & Design* **2009**, *9*, 1158-1163.
- [3] M. Werker, B. Dolfus, U. Ruschewitz, *Z. Anorg. Allg. Chem.* **2013**, *639*, 2487-2492.
- [4] A. L. Spek, Utrecht University, Utrecht, The Netherlands., **2002**.
- [5] CrysAlisPro Agilent Technologies, (compiled Aug 13 2014, 1.171.37.35 (release 13-08-2014 CrysAlis171 .NET) ed., **2014**.
- [6] A. Drozdov, A. Pozhitkov, S. Troyanov, A. Pisarevsky, *Polyhedron* **1996**, *15*, 1731-1735.
- [7] aS. H. Dale, M. R. J. Elsegood, *Acta Crystallographica Section E* **2003**, *59*, m586-m587; bH. el Hajjouji, E. Belmonte, J. Garcia-Lopez, I. Fernandez, M. J. Iglesias, L. Roces, S. Garcia-Granda, A. El Laghdach, F. Lopez Ortiz, *Organic & Biomolecular Chemistry* **2012**, *10*, 5647-5658; cB. G. Cooksey, L. T. Gibson, A. R. Kennedy, D. Littlejohn, L. Stewart, N. H. Tennent, *Acta Crystallographica Section C* **1999**, *55*, 324-326; dC. Borel, K. Davies, P. Handa, G. Hedberg, C. L. Oliver, S. A. Bourne, M. Håkansson, V. Langer, L. Öhrström, *Crystal Growth & Design* **2010**, *10*, 1971-1978.
- [8] aP.-Z. Hong, W.-D. Song, Z.-H. Wu, *Acta Crystallographica Section E* **2007**, *63*, m2296; bG. Marinescu, M. Andruh, M. Julve, F. Lloret, R. Llusa, S. Uriel, J. Vaissermann, *Crystal Growth & Design* **2004**, *5*, 261-267.
- [9] in *DIFFRAC.EVA.2.1* (Ed.: B.-A. DIFFRAC.EVA.2.1), Bruker-AXS©, **2010-2012**.
- [10] W. B. Jensen, *J. Chem. Educ.* **2009**, *86*, 1266.
